# Supplementary material for: Optimized tight binding between the S1 segment and KCNE3 is required for the constitutively open nature of the KCNQ1-KCNE3 channel complex
Source: eLife. 2022 Nov 4;11:e81683. doi: 10.7554/eLife.81683 (PMC9671499; doi:10.7554/eLife.81683)
Supplement: Figure 2—source data 1. — Maximum tail current amplitudes (Imax), parameters deduced from the Boltzmann fitting (V1/2 and z), and ratios of conductance at –100 mV (G–100mV) and maximum conductance (Gmax) of KCNQ1 WT and mutants with or without KCNE3 WT. n is the number of experiments. n.d., not determined. [file elife-81683-fig2-data1.xlsx]

## Sheet: Sheet1
Conditions	Imax (µA)	V1/2 (mV)	z	G-100mV/Gmax	n
KCNQ1 WT	1.7± 0.2	-31.0 ± 0.6	2.0 ± 0.0	0.08 ± 0.01	10
KCNQ1 WT + KCNE3 WT (10 ng + 3 ng)	2.3 ± 0.3	n.d.	n.d.	0.67 ± 0.01	5
KCNQ1 WT + KCNE3 WT (10 ng + 1 ng)	2.2 ± 0.4	n.d.	n.d.	0.80 ± 0.02	10
KCNQ1 WT + KCNE3 WT (10 ng + 0.3 ng)	2.7 ± 0.4	n.d.	n.d.	0.77 ± 0.02	5
KCNQ1 WT + KCNE3 WT (10 ng + 0.1 ng)	2.8 ± 0.4	-43.4 ± 1.2	1.2 ± 0.0	0.47 ± 0.03	5
KCNQ1 WT + KCNE3 WT (10 ng + 0.03 ng)	2.5 ± 0.2	-36.3 ± 1.2	1.6 ± 0.1	0.34 ± 0.03	5
KCNQ1 F123A	1.5± 0.1	-31.9 ± 0.6	2.2 ± 0.0	0.12 ± 0.01	10
KCNQ1 F123A + KCNE3 WT	1.3± 0.1	n.d.	n.d.	0.61 ± 0.01	10
KCNQ1 F123W	1.4± 0.3	-37.8 ± 0.3	2.3 ± 0.0	0.07 ± 0.00	10
KCNQ1 F123W + KCNE3 WT	2.3± 0.2	n.d.	n.d.	0.66 ± 0.01	10
KCNQ1 F127A	1.4 ± 0.2	-34.4 ± 0.6	2.2 ± 0.1	0.11 ± 0.01	10
KCNQ1 F127A + KCNE3 WT	1.6 ± 0.2	-29.0 ± 0.5	1.3 ± 0.0	0.17 ± 0.02	10
KCNQ1 F127V	1.1 ± 0.1	-27.0 ± 0.5	2.5 ± 0.0	0.09 ± 0.01	10
KCNQ1 F127V + KCNE3 WT	1.7 ± 0.2	-41.3 ± 0.4	1.4 ± 0.0	0.25 ± 0.02	10
KCNQ1 F127L	1.4 ± 0.1	-30.1 ± 0.2	2.1 ± 0.0	0.11 ± 0.01	10
KCNQ1 F127L + KCNE3 WT	1.7 ± 0.2	-29.8 ± 1.0	1.4 ± 0.0	0.38 ± 0.02	10
KCNQ1 F127W	2.3 ± 0.2	-26.7 ± 0.4	2.6 ± 0.1	0.04 ± 0.00	10
KCNQ1 F127W + KCNE3 WT	1.2 ± 0.1	n.d.	n.d.	0.61 ± 0.01	10
KCNQ1 F130A	1.1 ± 0.1	-23.9 ± 0.7	2.5 ± 0.0	0.06 ± 0.00	10
KCNQ1 F130A + KCNE3 WT	1.1 ± 0.1	42.3 ± 2.1	0.8 ± 0.0	0.02 ± 0.00	10
KCNQ1 F130V	1.3 ± 0.0	-16.6 ± 1.1	2.3 ± 0.1	0.05 ± 0.01	10
KCNQ1 F130V + KCNE3 WT	0.9 ± 0.1	-27.8 ± 2.1	1.2 ± 0.0	0.10 ± 0.01	10
KCNQ1 F130L	1.7 ± 0.2	-20.7 ± 0.4	2.1 ± 0.0	0.06 ± 0.01	10
KCNQ1 F130L + KCNE3 WT	1.5 ± 0.2	10.3 ± 2.2	1.1 ± 0.0	0.01 ± 0.00	10
KCNQ1 F130W	1.2 ± 0.1	-20.3 ± 0.4	2.1 ± 0.0	0.25 ± 0.02	10
KCNQ1 F130W + KCNE3 WT	2.1 ± 0.2	-9.8 ± 0.8	0.8 ± 0.0	0.37 ± 0.02	10
KCNQ1 L134A	1.7 ± 0.3	-26.9 ± 0.6	2.3 ± 0.1	0.07 ± 0.01	10
KCNQ1 L134A + KCNE3 WT	1.8 ± 0.2	-42.2 ± 1.4	1.0 ± 0.0	0.25 ± 0.01	10
KCNQ1 L134V	1.1 ± 0.2	-27.4 ± 0.2	2.2 ± 0.0	0.04 ± 0.00	10
KCNQ1 L134V + KCNE3 WT	1.8 ± 0.2	-18.4 ± 0.8	1.8 ± 0.1	0.08 ± 0.01	10
KCNQ1 L134F	1.1 ± 0.1	n.d.	n.d.	0.31 ± 0.02	10
KCNQ1 L134F + KCNE3 WT	1.5 ± 0.1	-25.4 ± 1.1	1.3 ± 0.0	0.35 ± 0.02	10
KCNQ1 L134W	0.4 ± 0.0	-31.1 ± 1.6	1.4 ± 0.1	0.10 ± 0.02	10
KCNQ1 L134W + KCNE3 WT	0.6 ± 0.1	n.d.	n.d.	0.68 ± 0.01	10
KCNQ1 I138A	2.2 ± 0.4	-29.0 ± 0.4	2.1 ± 0.0	0.05 ± 0.00	10
KCNQ1 I138A + KCNE3 WT	2.6 ± 0.2	-45.5 ± 0.9	1.1 ± 0.0	0.36 ± 0.02	10
KCNQ1 I138V	1.2 ± 0.1	-31.2 ± 0.5	2.1 ± 0.0	0.07 ± 0.01	10
KCNQ1 I138V + KCNE3 WT	1.6 ± 0.1	n.d.	n.d.	0.66 ± 0.01	10
KCNQ1 I138F	1.1 ± 0.2	-29.7 ± 0.4	2.2 ± 0.0	0.08 ± 0.01	10
KCNQ1 I138F + KCNE3 WT	2.2 ± 0.1	n.d.	n.d.	0.64 ± 0.01	10
KCNQ1 I138W	1.8 ± 0.3	-28.1 ± 0.6	2.3 ± 0.0	0.13 ± 0.01	10
KCNQ1 I138W + KCNE3 WT	2.6 ± 0.3	-26.2 ± 0.8	1.0 ± 0.0	0.36 ± 0.02	10
KCNQ1 L142A	1.5 ± 0.1	-37.7 ± 0.4	2.7 ± 0.1	0.16 ± 0.00	10
KCNQ1 L142A + KCNE3 WT	1.3 ± 0.1	12.5 ± 1.1	0.8 ± 0.0	0.24 ± 0.03	10
KCNQ1 L142V	2.1 ± 0.2	-35.2 ± 0.5	2.3 ± 0.1	0.10 ± 0.01	10
KCNQ1 L142V + KCNE3 WT	2.5 ± 0.2	-31.5 ± 0.8	0.9 ± 0.0	0.42 ± 0.02	10
KCNQ1 L142F	1.1 ± 0.1	-30.3 ± 0.5	2.4 ± 0.0	0.09 ± 0.00	10
KCNQ1 L142F + KCNE3 WT	2.4 ± 0.1	n.d.	n.d.	0.60 ± 0.01	10
KCNQ1 L142W	1.0 ± 0.1	-32.0 ± 0.5	2.5 ± 0.0	0.10 ± 0.01	10
KCNQ1 L142W + KCNE3 WT	1.7 ± 0.1	10.1 ± 0.7	1.1 ± 0.0	0.23 ± 0.02	10
KCNQ1 I145A	1.7 ± 0.2	-24.4 ± 0.3	2.6 ± 0.0	0.11 ± 0.01	10
KCNQ1 I145A + KCNE3 WT	1.7 ± 0.2	n.d.	n.d.	0.62 ± 0.01	10
KCNQ1 I145V	2.1 ± 0.2	-29.6 ± 0.9	2.4 ± 0.1	0.08 ± 0.01	10
KCNQ1 I145V + KCNE3 WT	2.5 ± 0.1	n.d.	n.d.	0.73 ± 0.01	10
KCNQ1 I145F	1.3 ± 0.2	-28.5 ± 1.0	2.3 ± 0.1	0.13 ± 0.01	10
KCNQ1 I145F + KCNE3 WT	1.7 ± 0.1	-13.4 ± 0.7	1.0 ± 0.0	0.11 ± 0.01	10
KCNQ1 I145W	1.8 ± 0.1	-16.1 ± 0.3	2.5 ± 0.1	0.11 ± 0.01	10
KCNQ1 I145W + KCNE3 WT	1.5 ± 0.2	-0.1 ± 1.7	1.0 ± 0.1	0.03 ± 0.00	10
