# Supplementary material for: Optimized tight binding between the S1 segment and KCNE3 is required for the constitutively open nature of the KCNQ1-KCNE3 channel complex
Source: eLife. 2022 Nov 4;11:e81683. doi: 10.7554/eLife.81683 (PMC9671499; doi:10.7554/eLife.81683)
Supplement: Figure 2—source data 2. [file elife-81683-fig2-data2.xlsx]

## Sheet: Figure 2
Panel G
KCNQ1 WT		N = 10		KCNQ1 WT + KCNE3 WT		N = 10		KCNQ1 F127A + KCNE3 WT		N = 10		KCNQ1 F127V + KCNE3 WT		N = 10		KCNQ1 F127L + KCNE3 WT		N = 10		KCNQ1 F127W + KCNE3 WT		N = 10
Voltage (mV)	G/Gmax			Voltage (mV)	G/Gmax			Voltage (mV)	G/Gmax			Voltage (mV)	G/Gmax			Voltage (mV)	G/Gmax			Voltage (mV)	G/Gmax
Mean	Mean	SEM		Mean	Mean	SEM		Mean	Mean	SEM		Mean	Mean	SEM		Mean	Mean	SEM		Mean	Mean	SEM
-99.7467	0.0840856	0.0112539		-99.7223	0.797233	0.0178904		-99.765	0.164782	0.0217018		-99.7223	0.251765	0.0241203		-99.7742	0.376222	0.0200161		-99.7833	0.611098	0.00690518
-79.7363	0.109526	0.0159996		-79.7302	0.850409	0.0140899		-79.7455	0.190286	0.0181117		-79.7638	0.299415	0.0201893		-79.8065	0.416492	0.0191753		-79.7974	0.664745	0.00702868
-59.787	0.177607	0.018775		-59.845	0.907785	0.00995928		-59.845	0.27865	0.0167487		-59.8755	0.429741	0.0161811		-59.8633	0.484659	0.0193576		-59.79	0.739622	0.00758297
-39.8102	0.382183	0.0171229		-39.8621	0.953001	0.0064379		-39.8926	0.450545	0.0150787		-39.859	0.62527	0.00992767		-39.8163	0.59363	0.0189739		-39.8438	0.817342	0.00791169
-19.9158	0.730326	0.0105433		-19.9615	0.980482	0.00343346		-19.9493	0.670614	0.011939		-19.9432	0.820573	0.00516281		-19.9402	0.759294	0.0147308		-19.9677	0.888969	0.00881397
0.0152588	0.943493	0.00441931		-0.0457764	0.988576	0.00174786		-0.00305176	0.842445	0.00791846		-0.00305176	0.939408	0.00411853		0.0396729	0.908811	0.00828278		0.012207	0.939003	0.00853272
19.9524	0.968163	0.0060251		19.9615	0.980007	0.00250499		19.9371	0.939416	0.00423495		19.9371	0.972411	0.0017882		20.0439	0.949172	0.00405586		19.8975	0.9635	0.00626898
39.917	0.942639	0.0106246		39.9048	0.959843	0.00462368		39.9689	0.981531	0.00157213		39.9658	0.958119	0.00567892		39.9139	0.923211	0.00589557		40.0238	0.978125	0.00329232
59.906	0.894794	0.0139763		59.848	0.929644	0.00738115		59.8328	0.982535	0.00172546		59.8419	0.921092	0.0106358		59.8358	0.871648	0.010858		59.8419	0.989521	0.00105896
Panel L
KCNQ1 I145A + KCNE3 WT		N = 10		KCNQ1 I145V + KCNE3 WT		N = 10		KCNQ1 I145F + KCNE3 WT		N = 10		KCNQ1 I145W + KCNE3 WT		N = 10
Voltage (mV)	G/Gmax			Voltage (mV)	G/Gmax			Voltage (mV)	G/Gmax			Voltage (mV)	G/Gmax
Mean	Mean	SEM		Mean	Mean	SEM		Mean	Mean	SEM		Mean	Mean	SEM
-99.7223	0.61606	0.0120492		-99.7406	0.727744	0.0108714		-99.7284	0.114307	0.00863969		-99.7437	0.030635	0.00332621
-79.7882	0.640936	0.0119658		-79.7058	0.795027	0.00731812		-79.7943	0.125435	0.00910825		-79.7058	0.0299688	0.00364907
-59.7961	0.684682	0.0118513		-59.7748	0.867883	0.00479458		-59.8755	0.176869	0.00947208		-59.8022	0.0550945	0.00490209
-39.8193	0.739956	0.0115986		-39.8376	0.927694	0.00284711		-39.8621	0.305498	0.00809962		-39.917	0.142563	0.00737191
-19.8975	0.799886	0.0109165		-19.9341	0.967169	0.00140339		-19.989	0.490675	0.0062824		-19.9432	0.307446	0.0124774
-0.0183105	0.857773	0.00967156		0.0152588	0.985101	0.000938871		-0.00305176	0.665392	0.00634912		-0.012207	0.507046	0.0175955
19.8822	0.907394	0.00804671		19.9738	0.981779	0.00183433		19.9188	0.796652	0.00644842		19.9585	0.681941	0.0208937
39.9506	0.943842	0.00611996		39.975	0.961841	0.0023466		39.9384	0.893658	0.00518051		39.8926	0.821139	0.0189527
59.8877	0.964821	0.00376827		59.8633	0.929485	0.00256736		59.903	0.969353	0.00329765		59.8785	0.924474	0.0129824
Panel M
	KCNQ1 WT	N =10		KCNQ1 F123A	N =10		KCNQ1 F123W	N =10
	-	+ KCNE3 WT		-	+ KCNE3 WT		-	+ KCNE3 WT
Mean	0.084	0.797		0.117	0.605		0.067	0.664
SEM	0.011	0.018		0.007	0.014		0.003	0.014
Panel N
	KCNQ1 F127A	N =10		KCNQ1 F127V	N =10		KCNQ1 F127L	N =10		KCNQ1 F127W	N =10
	-	+ KCNE3 WT		-	+ KCNE3 WT		-	+ KCNE3 WT		-	+ KCNE3 WT
Mean	0.114	0.165		0.09	0.252		0.111	0.376		0.035	0.611098
SEM	0.009	0.022		0.011	0.024		0.007	0.02		0.002	0.00690518
Panel O
	KCNQ1 F130A	N =10		KCNQ1 F130V	N =10		KCNQ1 F130L	N =10		KCNQ1 F130W	N =10
	-	+ KCNE3 WT		-	+ KCNE3 WT		-	+ KCNE3 WT		-	+ KCNE3 WT
Mean	0.055	0.024		0.045	0.104		0.055	0.007		0.247	0.374
SEM	0.004	0.003		0.008	0.006		0.005	0.002		0.023	0.017
Panel P
	KCNQ1 L134A	N =10		KCNQ1 L134V	N =10		KCNQ1 L134F	N =10		KCNQ1 L134W	N =10
	-	+ KCNE3 WT		-	+ KCNE3 WT		-	+ KCNE3 WT		-	+ KCNE3 WT
Mean	0.072	0.247		0.04	0.078		0.308	0.349		0.098	0.684
SEM	0.007	0.008		0.004	0.005		0.021	0.019		0.023	0.01
Panel Q
	KCNQ1 I138A	N =10		KCNQ1 I138V	N =10		KCNQ1 I138F	N =10		KCNQ1 I138W	N =10
	-	+ KCNE3 WT		-	+ KCNE3 WT		-	+ KCNE3 WT		-	+ KCNE3 WT
Mean	0.05	0.357		0.067	0.655		0.082	0.642		0.125	0.356
SEM	0.003	0.015		0.006	0.01		0.007	0.007		0.013	0.021
Panel R
	KCNQ1 L142A	N =10		KCNQ1 L142V	N =10		KCNQ1 L142F	N =10		KCNQ1 L142W	N =10
	-	+ KCNE3 WT		-	+ KCNE3 WT		-	+ KCNE3 WT		-	+ KCNE3 WT
Mean	0.158	0.242		0.096	0.42		0.087	0.597		0.097	0.234
SEM	0.003	0.029		0.007	0.015		0.003	0.011		0.005	0.018
Panel S
	KCNQ1 I145A	N =10		KCNQ1 I145V	N =10		KCNQ1 I145F	N =10		KCNQ1 I145W	N =10
	-	+ KCNE3 WT		-	+ KCNE3 WT		-	+ KCNE3 WT		-	+ KCNE3 WT
Mean	0.117	0.616		0.081	0.728		0.134	0.114		0.11	0.031
SEM	0.006	0.012		0.008	0.011		0.006	0.009		0.005	0.003

## Sheet: Figure 2-figure supplement 1
Panel E
KCNQ1 F123A		N = 10		KCNQ1 F123A + KCNE3 WT		N = 10
Voltage (mV)	G/Gmax			Voltage (mV)	G/Gmax
Mean	Mean	SEM		Mean	Mean	SEM
-99.725	0.117	0.007		-99.762	0.605	0.014
-79.776	0.143	0.008		-79.788	0.71	0.011
-59.811	0.21	0.01		-59.818	0.807	0.009
-39.874	0.413	0.012		-39.838	0.886	0.007
-19.91	0.769	0.012		-19.919	0.946	0.004
0.04	0.957	0.004		-0.015	0.97	0.002
19.98	0.976	0.004		19.977	0.957	0.005
39.972	0.951	0.006		39.868	0.917	0.01
59.906	0.911	0.007		59.869	0.861	0.014
Panel F
KCNQ1 F123W		N = 10		KCNQ1 F123W + KCNE3 WT		N = 10
Voltage (mV)	G/Gmax			Voltage (mV)	G/Gmax
Mean	Mean	SEM		Mean	Mean	SEM
-99.692	0.067	0.003		-99.756	0.664	0.014
-79.739	0.092	0.003		-79.745	0.726	0.011
-59.821	0.191	0.005		-59.766	0.806	0.008
-39.871	0.484	0.007		-39.874	0.885	0.005
-20.01	0.85	0.007		-19.888	0.948	0.003
0.04	0.968	0.003		0.018	0.976	0.002
19.949	0.955	0.008		19.962	0.973	0.004
39.896	0.915	0.014		39.969	0.946	0.006
59.879	0.861	0.018		59.848	0.904	0.007

## Sheet: Figure 2-figure supplement 2
Panel I
KCNQ1 F127A		N = 10		KCNQ1 F127A + KCNE3 WT		N = 10
Voltage (mV)	G/Gmax			Voltage (mV)	G/Gmax
Mean	Mean	SEM		Mean	Mean	SEM
-99.701	0.114	0.009		-99.765	0.165	0.022
-79.779	0.126	0.008		-79.745	0.19	0.018
-59.848	0.206	0.01		-59.845	0.279	0.017
-39.865	0.447	0.013		-39.893	0.451	0.015
-19.925	0.807	0.012		-19.949	0.671	0.012
-0.037	0.962	0.008		-0.003	0.842	0.008
19.986	0.962	0.009		19.937	0.939	0.004
39.926	0.939	0.011		39.969	0.982	0.002
59.781	0.9	0.013		59.833	0.983	0.002
Panel J
KCNQ1 F127V		N = 10		KCNQ1 F127V + KCNE3 WT		N = 10
Voltage (mV)	G/Gmax			Voltage (mV)	G/Gmax
Mean	Mean	SEM		Mean	Mean	SEM
-99.716	0.09	0.011		-99.722	0.252	0.024
-79.758	0.096	0.011		-79.764	0.299	0.02
-59.772	0.133	0.012		-59.875	0.43	0.016
-39.893	0.29	0.015		-39.859	0.625	0.01
-19.931	0.695	0.011		-19.943	0.821	0.005
0.021	0.959	0.003		-0.003	0.939	0.004
20.007	0.977	0.003		19.937	0.972	0.002
39.902	0.95	0.006		39.966	0.958	0.006
59.869	0.916	0.009		59.842	0.921	0.011
Panel K
KCNQ1 F127L		N = 10		KCNQ1 F127L + KCNE3 WT		N = 10
Voltage (mV)	G/Gmax			Voltage (mV)	G/Gmax
Mean	Mean	SEM		Mean	Mean	SEM
-100.769	0.111	0.007		-99.774	0.376	0.02
-80.576	0.137	0.008		-79.807	0.416	0.019
-60.416	0.196	0.009		-59.863	0.485	0.019
-40.341	0.378	0.009		-39.816	0.594	0.019
-20.218	0.729	0.005		-19.94	0.759	0.015
-0.046	0.949	0.005		0.04	0.909	0.008
20.062	0.963	0.007		20.044	0.949	0.004
40.152	0.918	0.01		39.914	0.923	0.006
60.315	0.855	0.012		59.836	0.872	0.011
Panel L
KCNQ1 F127W		N = 10		KCNQ1 F127W + KCNE3 WT		N = 10
Voltage (mV)	G/Gmax			Voltage (mV)	G/Gmax
Mean	Mean	SEM		Mean	Mean	SEM
-100.18	0.035	0.002		-99.783	0.611	0.007
-80.157	0.045	0.002		-79.797	0.665	0.007
-60.141	0.081	0.003		-59.79	0.74	0.008
-40.121	0.239	0.005		-39.844	0.817	0.008
-20.102	0.672	0.01		-19.968	0.889	0.009
-0.037	0.948	0.007		0.012	0.939	0.009
19.952	0.931	0.012		19.897	0.963	0.006
40.082	0.841	0.015		40.024	0.978	0.003
60.104	0.757	0.017		59.842	0.99	0.001

## Sheet: Figure 2-figure supplement 3
Panel I
KCNQ1 F130A		N = 10		KCNQ1 F130A + KCNE3 WT		N = 10
Voltage (mV)	G/Gmax			Voltage (mV)	G/Gmax
Mean	Mean	SEM		Mean	Mean	SEM
-100.256	0.055	0.004		-100.815	0.024	0.003
-80.191	0.069	0.006		-80.676	0.033	0.004
-60.19	0.11	0.008		-60.477	0.051	0.006
-40.128	0.259	0.01		-40.369	0.08	0.008
-20.071	0.679	0.014		-20.291	0.129	0.011
-0.027	0.951	0.007		-0.104	0.21	0.015
20.023	0.95	0.011		20.047	0.332	0.018
40.125	0.907	0.017		40.222	0.494	0.018
60.083	0.851	0.021		60.321	0.648	0.015
Panel J
KCNQ1 F130V		N = 10		KCNQ1 F130V + KCNE3 WT		N = 10
Voltage (mV)	G/Gmax			Voltage (mV)	G/Gmax
Mean	Mean	SEM		Mean	Mean	SEM
-100.522	0.045	0.008		-100.339	0.104	0.006
-80.344	0.056	0.009		-80.267	0.161	0.009
-60.208	0.082	0.011		-60.19	0.259	0.016
-40.274	0.167	0.014		-40.155	0.404	0.022
-20.148	0.445	0.027		-20.12	0.607	0.022
-0.082	0.835	0.017		-0.079	0.812	0.012
20.053	0.963	0.003		20.007	0.912	0.008
40.079	0.945	0.006		40.146	0.912	0.011
60.132	0.896	0.011		60.132	0.842	0.015
Panel K
KCNQ1 F130L		N = 10		KCNQ1 F130L + KCNE3 WT		N = 10
Voltage (mV)	G/Gmax			Voltage (mV)	G/Gmax
Mean	Mean	SEM		Mean	Mean	SEM
-99.933	0.055	0.005		-99.756	0.007	0.002
-79.907	0.064	0.005		-79.782	0.012	0.003
-59.875	0.096	0.007		-59.866	0.032	0.004
-39.948	0.217	0.01		-39.926	0.087	0.008
-19.968	0.538	0.01		-19.946	0.21	0.015
-0.073	0.866	0.005		0.049	0.399	0.022
20.016	0.966	0.002		20.013	0.598	0.024
39.941	0.952	0.003		39.886	0.77	0.02
60.028	0.899	0.004		59.83	0.896	0.013
Panel L
KCNQ1 F130W		N = 10		KCNQ1 F130W + KCNE3 WT		N = 10
Voltage (mV)	G/Gmax			Voltage (mV)	G/Gmax
Mean	Mean	SEM		Mean	Mean	SEM
-100.717	0.247	0.023		-100.146	0.374	0.017
-80.539	0.26	0.023		-80.115	0.39	0.016
-60.522	0.287	0.023		-60.126	0.434	0.016
-40.338	0.379	0.019		-39.99	0.509	0.014
-20.242	0.62	0.011		-20.105	0.609	0.012
-0.146	0.888	0.004		-0.101	0.716	0.01
20.023	0.968	0.001		20.029	0.811	0.007
40.189	0.942	0.004		40.039	0.887	0.005
60.318	0.894	0.009		60.04	0.941	0.003

## Sheet: Figure 2-figure supplement 4
Panel I
KCNQ1 L134A		N = 10		KCNQ1 L134A + KCNE3 WT		N = 10
Voltage (mV)	G/Gmax			Voltage (mV)	G/Gmax
Mean	Mean	SEM		Mean	Mean	SEM
-100.665	0.072	0.007		-99.796	0.247	0.008
-80.524	0.094	0.009		-79.788	0.32	0.009
-60.474	0.14	0.011		-59.915	0.446	0.011
-40.332	0.29	0.015		-39.914	0.607	0.012
-20.264	0.671	0.013		-20.044	0.764	0.012
-0.107	0.935	0.006		-0.095	0.875	0.01
20.032	0.981	0.002		19.791	0.938	0.007
40.106	0.965	0.006		39.661	0.973	0.004
60.223	0.93	0.009		59.503	0.981	0.003
Panel J
KCNQ1 L134V		N = 10		KCNQ1 L134V + KCNE3 WT		N = 10
Voltage (mV)	G/Gmax			Voltage (mV)	G/Gmax
Mean	Mean	SEM		Mean	Mean	SEM
-100.522	0.045	0.008		-100.339	0.104	0.006
-80.344	0.056	0.009		-80.267	0.161	0.009
-60.208	0.082	0.011		-60.19	0.259	0.016
-40.274	0.167	0.014		-40.155	0.404	0.022
-20.148	0.445	0.027		-20.12	0.607	0.022
-0.082	0.835	0.017		-0.079	0.812	0.012
20.053	0.963	0.003		20.007	0.912	0.008
40.079	0.945	0.006		40.146	0.912	0.011
60.132	0.896	0.011		60.132	0.842	0.015
Panel K
KCNQ1 L134F		N = 10		KCNQ1 L134F + KCNE3 WT		N = 10
Voltage (mV)	G/Gmax			Voltage (mV)	G/Gmax
Mean	Mean	SEM		Mean	Mean	SEM
-100.745	0.308	0.021		-99.768	0.349	0.019
-80.554	0.385	0.023		-79.794	0.372	0.02
-60.443	0.453	0.023		-59.86	0.433	0.02
-40.286	0.583	0.021		-39.893	0.547	0.018
-20.163	0.824	0.011		-19.916	0.713	0.014
-0.098	0.971	0.003		-0.021	0.861	0.01
20.029	0.989	0.001		19.949	0.943	0.005
40.131	0.974	0.002		39.92	0.966	0.003
60.3	0.944	0.004		59.808	0.943	0.008
Panel L
KCNQ1 L134W		N = 10		KCNQ1 L134W + KCNE3 WT		N = 10
Voltage (mV)	G/Gmax			Voltage (mV)	G/Gmax
Mean	Mean	SEM		Mean	Mean	SEM
-100.226	0.098	0.023		-99.799	0.684	0.01
-80.185	0.157	0.024		-79.803	0.721	0.01
-60.147	0.248	0.028		-59.833	0.774	0.009
-40.109	0.408	0.027		-39.911	0.827	0.009
-20.105	0.683	0.014		-19.989	0.875	0.008
-0.098	0.889	0.005		0.003	0.914	0.007
19.98	0.953	0.002		19.925	0.945	0.006
40.079	0.961	0.007		39.96	0.966	0.004
60.046	0.945	0.013		59.897	0.977	0.002

## Sheet: Figure 2-figure supplement 5
Panel I
KCNQ1 I138A		N = 10		KCNQ1 I138A + KCNE3 WT		N = 10
Voltage (mV)	G/Gmax			Voltage (mV)	G/Gmax
Mean	Mean	SEM		Mean	Mean	SEM
-99.744	0.05	0.003		-99.725	0.357	0.015
-79.758	0.066	0.003		-79.788	0.428	0.016
-59.872	0.126	0.004		-59.833	0.545	0.015
-39.871	0.327	0.006		-39.835	0.688	0.012
-19.919	0.69	0.008		-19.952	0.83	0.005
0.009	0.935	0.004		0.021	0.927	0.003
19.94	0.974	0.001		19.968	0.967	0.002
39.963	0.95	0.004		39.92	0.976	0.003
59.879	0.9	0.009		59.885	0.966	0.006
Panel J
KCNQ1 I138V		N = 10		KCNQ1 I138V + KCNE3 WT		N = 10
Voltage (mV)	G/Gmax			Voltage (mV)	G/Gmax
Mean	Mean	SEM		Mean	Mean	SEM
-100.818	0.067	0.006		-99.78	0.655	0.01
-80.655	0.092	0.008		-79.791	0.714	0.008
-60.461	0.158	0.011		-59.796	0.791	0.007
-40.363	0.362	0.013		-39.877	0.862	0.006
-20.224	0.733	0.008		-19.919	0.916	0.005
-0.089	0.953	0.002		-0.031	0.953	0.004
20.047	0.976	0.001		19.977	0.975	0.003
40.128	0.948	0.002		39.926	0.987	0.001
60.291	0.896	0.005		59.882	0.989	0.001
Panel K
KCNQ1 I138F		N = 10		KCNQ1 I138F + KCNE3 WT		N = 10
Voltage (mV)	G/Gmax			Voltage (mV)	G/Gmax
Mean	Mean	SEM		Mean	Mean	SEM
-99.744	0.082	0.007		-99.716	0.642	0.007
-79.739	0.093	0.007		-79.761	0.697	0.006
-59.851	0.151	0.009		-59.845	0.764	0.005
-39.886	0.349	0.011		-39.832	0.844	0.004
-19.931	0.722	0.008		-19.894	0.923	0.004
0.003	0.944	0.003		0.009	0.966	0.003
19.995	0.983	0.001		19.885	0.972	0.003
39.902	0.973	0.004		39.957	0.954	0.005
59.875	0.941	0.006		59.903	0.912	0.006
Panel L
KCNQ1 I138W		N = 10		KCNQ1 I138W + KCNE3 WT		N = 10
Voltage (mV)	G/Gmax			Voltage (mV)	G/Gmax
Mean	Mean	SEM		Mean	Mean	SEM
-100.601	0.125	0.013		-99.661	0.356	0.021
-80.386	0.135	0.013		-79.73	0.387	0.02
-60.397	0.177	0.014		-59.872	0.459	0.018
-40.292	0.345	0.016		-39.975	0.569	0.015
-20.163	0.71	0.012		-20.187	0.699	0.01
-0.159	0.942	0.005		-0.348	0.813	0.01
19.968	0.983	0.001		19.162	0.892	0.008
40.106	0.96	0.005		39.008	0.945	0.006
60.15	0.913	0.009		58.81	0.975	0.004

## Sheet: Figure 2-figure supplement 6
Panel I
KCNQ1 L142A		N = 10		KCNQ1 L142A + KCNE3 WT		N = 10
Voltage (mV)	G/Gmax			Voltage (mV)	G/Gmax
Mean	Mean	SEM		Mean	Mean	SEM
-99.67	0.158	0.003		-99.78	0.242	0.029
-79.816	0.185	0.004		-79.788	0.248	0.029
-59.784	0.263	0.005		-59.787	0.277	0.029
-39.816	0.528	0.007		-39.89	0.333	0.028
-19.922	0.903	0.007		-19.971	0.421	0.023				S
-0.049	0.974	0.001		0.009	0.532	0.017
19.958	0.924	0.003		19.965	0.652	0.01
39.938	0.867	0.005		39.874	0.766	0.006
59.888	0.813	0.007		59.824	0.862	0.005
Panel J
KCNQ1 L142V		N = 10		KCNQ1 L142V + KCNE3 WT		N = 10
Voltage (mV)	G/Gmax			Voltage (mV)	G/Gmax
Mean	Mean	SEM		Mean	Mean	SEM
-99.701	0.096	0.007		-99.716	0.42	0.015
-79.855	0.12	0.008		-79.77	0.467	0.013
-59.79	0.198	0.009		-59.781	0.54	0.012
-39.761	0.455	0.01		-39.774	0.637	0.012
-19.913	0.822	0.012		-19.922	0.743	0.011
0.104	0.962	0.003		0.015	0.838	0.01
19.962	0.936	0.007		20.001	0.907	0.008
39.844	0.882	0.01		39.957	0.95	0.005
59.708	0.828	0.012		59.833	0.969	0.003
Panel K
KCNQ1 L142F		N = 10		KCNQ1 L142F + KCNE3 WT		N = 10
Voltage (mV)	G/Gmax			Voltage (mV)	G/Gmax
Mean	Mean	SEM		Mean	Mean	SEM
-99.713	0.087	0.003		-99.811	0.597	0.011
-79.721	0.097	0.003		-79.73	0.639	0.01
-59.778	0.146	0.004		-59.787	0.716	0.01
-39.893	0.35	0.008		-39.838	0.799	0.009
-19.916	0.747	0.009		-19.934	0.87	0.009
0.015	0.963	0.003		-0.034	0.922	0.007
19.965	0.984	0.001		19.901	0.957	0.005
39.948	0.973	0.005		39.899	0.979	0.003
59.86	0.947	0.007		59.912	0.987	0.002
Panel L
KCNQ1 L142W		N = 10		KCNQ1 L142W + KCNE3 WT		N = 10
Voltage (mV)	G/Gmax			Voltage (mV)	G/Gmax
Mean	Mean	SEM		Mean	Mean	SEM
-99.786	0.097	0.005		-99.722	0.234	0.018
-79.8	0.114	0.005		-79.736	0.233	0.018
-59.766	0.172	0.004		-59.799	0.25	0.017
-39.828	0.383	0.008		-39.841	0.295	0.016
-19.922	0.798	0.011		-19.943	0.385	0.013
0.003	0.96	0.004		-0.04	0.527	0.009
19.977	0.912	0.004		19.986	0.695	0.006
39.926	0.822	0.007		39.899	0.839	0.004
59.882	0.736	0.01		59.857	0.926	0.003

## Sheet: Figure 2-figure supplement 7
Panel I
KCNQ1 I145A		N = 10		KCNQ1 I145A + KCNE3 WT		N = 10
Voltage (mV)	G/Gmax			Voltage (mV)	G/Gmax
Mean	Mean	SEM		Mean	Mean	SEM
-100.351	0.117	0.006		-99.722	0.616	0.012
-80.246	0.13	0.006		-79.788	0.641	0.012
-60.254	0.163	0.006		-59.796	0.685	0.012
-40.121	0.295	0.007		-39.819	0.74	0.012
-20.114	0.695	0.012		-19.897	0.8	0.011				S
-0.003	0.957	0.006		-0.018	0.858	0.01
20.007	0.983	0.001		19.882	0.907	0.008
40.082	0.951	0.007		39.951	0.944	0.006
60.15	0.906	0.013		59.888	0.965	0.004
Panel J
KCNQ1 I145V		N = 10		KCNQ1 I145V + KCNE3 WT		N = 10
Voltage (mV)	G/Gmax			Voltage (mV)	G/Gmax
Mean	Mean	SEM		Mean	Mean	SEM
-99.734	0.081	0.008		-99.741	0.728	0.011
-79.73	0.104	0.01		-79.706	0.795	0.007
-59.766	0.159	0.013		-59.775	0.868	0.005
-39.865	0.341	0.021		-39.838	0.928	0.003
-19.897	0.734	0.018		-19.934	0.967	0.001
0.058	0.954	0.005		0.015	0.985	0.001
19.952	0.983	0.001		19.974	0.982	0.002
39.993	0.965	0.002		39.975	0.962	0.002
59.894	0.931	0.004		59.863	0.929	0.003
Panel K
KCNQ1 I145F		N = 10		KCNQ1 I145F + KCNE3 WT		N = 10
Voltage (mV)	G/Gmax			Voltage (mV)	G/Gmax
Mean	Mean	SEM		Mean	Mean	SEM
-99.826	0.134	0.006		-99.728	0.114	0.009
-79.755	0.154	0.006		-79.794	0.125	0.009
-59.775	0.206	0.007		-59.875	0.177	0.009
-39.819	0.371	0.013		-39.862	0.305	0.008
-19.897	0.728	0.021		-19.989	0.491	0.006
0.046	0.945	0.009		-0.003	0.665	0.006
19.937	0.98	0.002		19.919	0.797	0.006
39.957	0.963	0.007		39.938	0.894	0.005
59.915	0.924	0.011		59.903	0.969	0.003
Panel L
KCNQ1 I145W		N = 10		KCNQ1 I145W + KCNE3 WT		N = 10
Voltage (mV)	G/Gmax			Voltage (mV)	G/Gmax
Mean	Mean	SEM		Mean	Mean	SEM
-100.345	0.11	0.005		-99.744	0.031	0.003
-80.139	0.115	0.004		-79.706	0.03	0.004
-60.117	0.134	0.004		-59.802	0.055	0.005
-40.091	0.205	0.005		-39.917	0.143	0.007
-20.157	0.464	0.006		-19.943	0.307	0.012
-0.082	0.853	0.007		-0.012	0.507	0.018
20.001	0.972	0.002		19.958	0.682	0.021
40.06	0.943	0.01		39.893	0.821	0.019
60.056	0.881	0.014		59.879	0.924	0.013
