# Supplementary material for: Optimized tight binding between the S1 segment and KCNE3 is required for the constitutively open nature of the KCNQ1-KCNE3 channel complex
Source: eLife. 2022 Nov 4;11:e81683. doi: 10.7554/eLife.81683 (PMC9671499; doi:10.7554/eLife.81683)
Supplement: Figure 3—source data 1. — Maximum tail current amplitudes (Imax), parameters deduced from the Boltzmann fitting (V1/2 and z), and ratios of conductance at –100 mV (G−100mV) and maximum conductance (Gmax) of KCNQ1 WT with KCNE3 mutants. n is the number of experiments. n.d., not determined. [file elife-81683-fig3-data1.xlsx]

## Sheet: Sheet1
Conditions	Imax (µA)	V1/2 (mV)	z	G-100mV/Gmax	n
KCNQ1 WT + KCNE3 S57G	1.7 ± 0.3	-26.5 ± 2.4	0.8 ± 0.1	0.32 ± 0.02	10
KCNQ1 WT + KCNE3 S57A (10 ng + 3 ng)	3.0 ± 0.5	n.d.	n.d.	0.62 ± 0.02	5
KCNQ1 WT + KCNE3 S57A (10 ng + 1 ng)	2.5 ± 0.2	n.d.	n.d.	0.66 ± 0.02	10
KCNQ1 WT + KCNE3 S57A (10 ng + 0.3 ng)	3.0 ± 0.3	n.d.	n.d.	0.64 ± 0.03	5
KCNQ1 WT + KCNE3 S57A (10 ng + 0.1 ng)	2.6 ± 0.3	-40.3 ± 1.2	1.2 ± 0.1	0.47 ± 0.01	5
KCNQ1 WT + KCNE3 S57A (10 ng + 0.03 ng)	2.6 ± 0.3	-32.4 ± 0.9	1.8 ± 0.1	0.29 ± 0.01	5
KCNQ1 WT + KCNE3 S57V	2.5 ± 0.1	3.4 ± 1.5	0.6 ± 0.0	0.47 ± 0.01	10
KCNQ1 WT + KCNE3 S57L	2.0 ± 0.1	-9.1 ± 1.5	0.8 ± 0.0	0.20 ± 0.01	10
KCNQ1 WT + KCNE3 S57F	1.9 ± 0.2	-21.4 ± 1.8	1.2 ± 0.0	0.10 ± 0.01	10
KCNQ1 WT + KCNE3 S57W	2.3 ± 0.1	-12.9 ± 1.0	1.0 ± 0.0	0.10 ± 0.01	10
KCNQ1 WT + KCNE3 I61G	3.1 ± 0.3	23.2 ± 1.1	1.0 ± 0.0	0.04 ± 0.01	10
KCNQ1 WT + KCNE3 I61A	3.4 ± 0.4	21.1 ± 1.5	1.0 ± 0.0	0.03 ± 0.01	10
KCNQ1 WT + KCNE3 I61V	2.3 ± 0.3	n.d.	n.d.	0.57 ± 0.02	10
KCNQ1 WT + KCNE3 I61F	3.4 ± 0.2	-3.9 ± 0.9	0.9 ± 0.0	0.04 ± 0.00	10
KCNQ1 WT + KCNE3 I61W	2.2 ± 0.2	-25.4 ± 0.6	1.4 ± 0.0	0.11 ± 0.01	10
KCNQ1 WT + KCNE3 M65G	2.0 ± 0.2	-43.8 ± 0.6	1.4 ± 0.0	0.22 ± 0.01	10
KCNQ1 WT + KCNE3 M65A	2.3 ± 0.2	-55.6 ± 0.8	1.3 ± 0.0	0.48 ± 0.01	10
KCNQ1 WT + KCNE3 M65V	1.5 ± 0.1	-24.6 ± 1.5	1.0 ± 0.0	0.16 ± 0.02	10
KCNQ1 WT + KCNE3 M65L	2.0 ± 0.2	n.d.	n.d.	0.63 ± 0.03	10
KCNQ1 WT + KCNE3 M65F	2.4 ± 0.3	-42.2 ± 1.5	0.8 ± 0.0	0.36 ± 0.02	10
KCNQ1 WT + KCNE3 M65W	1.7 ± 0.2	-29.7 ± 0.4	1.3 ± 0.0	0.07 ± 0.01	10
KCNQ1 WT + KCNE3 A69G	1.9 ± 0.2	n.d.	n.d.	0.57 ± 0.03	10
KCNQ1 WT + KCNE3 A69V	2.0 ± 0.2	-16.5 ± 1.6	0.8 ± 0.1	0.19 ± 0.02	10
KCNQ1 WT + KCNE3 A69L	1.6 ± 0.2	-21.7 ± 1.3	1.4 ± 0.0	0.17 ± 0.01	10
KCNQ1 WT + KCNE3 A69F	2.3 ± 0.2	-3.6 ± 0.8	1.1 ± 0.0	0.11 ± 0.01	10
KCNQ1 WT + KCNE3 A69W	2.1 ± 0.2	-10.9 ± 1.0	1.5 ± 0.1	0.04 ± 0.01	10
KCNQ1 WT + KCNE3 G73A	2.4 ± 0.2	n.d.	n.d.	0.77 ± 0.01	10
KCNQ1 WT + KCNE3 G73V	1.6 ± 0.1	-42.7 ± 1.1	1.4 ± 0.0	0.22 ± 0.02	10
KCNQ1 WT + KCNE3 G73L (10 ng + 3 ng)	1.8 ± 0.2	-46.8 ± 1.0	1.3 ± 0.1	0.34 ± 0.01	5
KCNQ1 WT + KCNE3 G73L (10 ng + 1 ng)	2.0 ± 0.2	-47.6 ± 1.1	1.2 ± 0.0	0.35 ± 0.02	10
KCNQ1 WT + KCNE3 G73L (10 ng + 0.3 ng)	2.2 ± 0.6	-44.1 ± 0.9	1.4 ± 0.1	0.34 ± 0.02	5
KCNQ1 WT + KCNE3 G73L (10 ng + 0.1 ng)	2.1 ± 0.2	-36.5 ± 0.9	1.7 ± 0.1	0.34 ± 0.03	5
KCNQ1 WT + KCNE3 G73L (10 ng + 0.03 ng)	1.9 ± 0.1	-32.7 ± 1.1	2.1 ± 0.1	0.14 ± 0.01	5
KCNQ1 WT + KCNE3 G73F	2.1 ± 0.2	-43.0 ± 1.1	1.2 ± 0.0	0.43 ± 0.02	10
KCNQ1 WT + KCNE3 G73W	2.3 ± 0.2	-42.4 ± 1.7	1.2 ± 0.0	0.24 ± 0.01	10
KCNQ1 WT + KCNE3 I76G	4.0 ± 0.3	30.6 ± 2.1	0.7 ± 0.0	0.06 ± 0.01	10
KCNQ1 WT + KCNE3 I76A	2.3 ± 0.3	-31.9 ± 1.2	2.1 ± 0.1	0.14 ± 0.02	10
KCNQ1 WT + KCNE3 I76V	1.7 ± 0.3	-45.0 ± 1.3	0.9 ± 0.0	0.43 ± 0.01	10
KCNQ1 WT + KCNE3 I76F	1.7 ± 0.2	-36.3 ± 2.2	0.8 ± 0.0	0.11 ± 0.01	10
KCNQ1 WT + KCNE3 I76W	1.8 ± 0.2	-26.0 ± 1.5	0.8 ± 0.0	0.16 ± 0.01	10
