# Supplementary material for: Optimized tight binding between the S1 segment and KCNE3 is required for the constitutively open nature of the KCNQ1-KCNE3 channel complex
Source: eLife. 2022 Nov 4;11:e81683. doi: 10.7554/eLife.81683 (PMC9671499; doi:10.7554/eLife.81683)
Supplement: Figure 3—source data 2. [file elife-81683-fig3-data2.xlsx]

## Sheet: Figure 3
Panel G
KCNQ1 WT + KCNE3 S57G		N = 10		KCNQ1 WT + KCNE3 S57A		N = 10		KCNQ1 WT + KCNE3 S57V		N = 10		KCNQ1 WT + KCNE3 S57L		N = 10		KCNQ1 WT + KCNE3 S57F		N = 10		KCNQ1 WT + KCNE3 S57W		N = 10
Voltage (mV)	G/Gmax			Voltage (mV)	G/Gmax			Voltage (mV)	G/Gmax			Voltage (mV)	G/Gmax			Voltage (mV)	G/Gmax			Voltage (mV)	G/Gmax
Mean	Mean	SEM		Mean	Mean	SEM		Mean	Mean	SEM		Mean	Mean	SEM		Mean	Mean	SEM		Mean	Mean	SEM
-99.75	0.323	0.017		-99.667	0.661	0.02		-99.738	0.469	0.007		-99.738	0.202	0.012		-99.783	0.1	0.008		-99.799	0.101	0.005
-79.681	0.365	0.017		-79.709	0.7	0.02		-79.709	0.492	0.007		-79.834	0.237	0.013		-79.645	0.139	0.012		-79.767	0.133	0.006
-59.723	0.444	0.017		-59.836	0.745	0.02		-59.808	0.528	0.007		-59.784	0.296	0.014		-59.805	0.207	0.016		-59.811	0.194	0.007
-39.88	0.548	0.015		-39.819	0.789	0.019		-39.859	0.575	0.006		-39.761	0.387	0.014		-39.865	0.34	0.021		-39.89	0.306	0.009
-19.91	0.663	0.014		-20.007	0.828	0.018		-19.952	0.635	0.006		-19.919	0.509	0.014		-19.87	0.565	0.023		-19.894	0.477	0.01
-0.037	0.764	0.017		-0.046	0.863	0.017		-0.006	0.699	0.006		0.046	0.633	0.012		0.018	0.761	0.018		-0.012	0.65	0.01
19.946	0.84	0.017		19.885	0.895	0.016		19.958	0.763	0.006		19.955	0.745	0.011		20.02	0.876	0.012		19.94	0.779	0.01
39.954	0.9	0.013		39.932	0.921	0.013		40.03	0.825	0.005		39.963	0.839	0.008		39.996	0.949	0.007		39.914	0.878	0.008
59.897	0.94	0.009		59.869	0.936	0.011		59.903	0.876	0.006		59.824	0.907	0.006		59.833	0.987	0.002		59.985	0.95	0.005
Panel M
KCNQ1 WT + KCNE3 G73A		N = 10		KCNQ1 WT + KCNE3 G73V		N = 10		KCNQ1 WT + KCNE3 G73L		N = 10		KCNQ1 WT + KCNE3 G73F		N = 10		KCNQ1 WT + KCNE3 G73W		N = 10
Voltage (mV)	G/Gmax			Voltage (mV)	G/Gmax			Voltage (mV)	G/Gmax			Voltage (mV)	G/Gmax			Voltage (mV)	G/Gmax
Mean	Mean	SEM		Mean	Mean	SEM		Mean	Mean	SEM		Mean	Mean	SEM		Mean	Mean	SEM
-99.738	0.765	0.009		-99.655	0.219	0.018		-100.528	0.346	0.016		-100.772	0.428	0.017		-100.027	0.242	0.014
-79.858	0.832	0.008		-79.782	0.28	0.017		-80.429	0.427	0.015		-80.646	0.487	0.016		-79.993	0.314	0.017
-59.805	0.902	0.007		-59.79	0.418	0.018		-60.287	0.548	0.015		-60.474	0.582	0.017		-60.001	0.441	0.02
-39.862	0.955	0.004		-39.88	0.619	0.016		-40.146	0.698	0.012		-40.372	0.706	0.014		-39.951	0.611	0.019
-19.995	0.982	0.002		-19.949	0.825	0.011		-20.151	0.855	0.006		-20.212	0.845	0.008		-20.071	0.792	0.011
-0.085	0.977	0.003		-0.015	0.945	0.005		-0.116	0.943	0.005		-0.073	0.938	0.004		0.037	0.916	0.005
19.928	0.944	0.004		20.035	0.97	0.002		20.01	0.961	0.007		20.096	0.967	0.002		20.001	0.956	0.002
39.957	0.892	0.005		39.966	0.942	0.005		40.125	0.95	0.01		40.118	0.964	0.005		40.002	0.945	0.004
59.833	0.829	0.006		59.857	0.886	0.008		60.193	0.92	0.012		60.3	0.938	0.007		60.068	0.896	0.007
Panel N
	KCNQ1 WT	N =10
	+ KCNE3 S57G	+ KCNE3 S57A	+ KCNE3 S57V	+ KCNE3 S57L	+ KCNE3 S57F	+ KCNE3 S57W
Mean	0.323	0.661	0.469	0.202	0.1	0.101
SEM	0.017	0.02	0.007	0.012	0.008	0.005
Panel O
	KCNQ1 WT	N =10
	+ KCNE3 I61G	+ KCNE3 I61A	+ KCNE3 I61V	+ KCNE3 I61F	+ KCNE3 I61W
Mean	0.043	0.029	0.57	0.043	0.11
SEM	0.006	0.005	0.021	0.003	0.008
Panel P
	KCNQ1 WT	N =10
	+ KCNE3 M65G	+ KCNE3 M65A	+ KCNE3 M65V	+ KCNE3 M65L	+ KCNE3 M65F	+ KCNE3 M65W
Mean	0.222	0.478	0.164	0.631	0.356	0.066
SEM	0.012	0.013	0.018	0.029	0.016	0.006
Panel Q
	KCNQ1 WT	N =10
	+ KCNE3 A69G	+ KCNE3 A69V	+ KCNE3 A69L	+ KCNE3 A69F	+ KCNE3 A69W
Mean	0.574	0.185	0.165	0.111	0.037
SEM	0.027	0.019	0.009	0.012	0.005
Panel R
	KCNQ1 WT	N =10
	+ KCNE3 G73A	+ KCNE3 G73V	+ KCNE3 G73L	+ KCNE3 G73F	+ KCNE3 G73W
Mean	0.765	0.219	0.346	0.428	0.242
SEM	0.009	0.018	0.016	0.017	0.014
Panel S
	KCNQ1 WT	N =10
	+ KCNE3 I76G	+ KCNE3 I76A	+ KCNE3 I76V	+ KCNE3 I76F	+ KCNE3 I76W
Mean	0.063	0.135	0.431	0.113	0.164
SEM	0.005	0.018	0.011	0.005	0.006

## Sheet: Figure 3-figure supplement 1
Panel F
KCNQ1 WT + KCNE3 WT (10 ng + 3 ng)		N = 5		KCNQ1 WT + KCNE3 WT (10 ng + 0.3 ng)		N = 5		KCNQ1 WT + KCNE3 WT (10 ng + 0.1 ng)		N = 5		KCNQ1 WT + KCNE3 WT (10 ng + 0.03 ng)		N = 5
Voltage (mV)	G/Gmax			Voltage (mV)	G/Gmax			Voltage (mV)	G/Gmax			Voltage (mV)	G/Gmax
Mean	Mean	SEM		Mean	Mean	SEM		Mean	Mean	SEM		Mean	Mean	SEM
-100.83	0.665	0.007		-100.928	0.769	0.023		-100.848	0.471	0.032		-100.873	0.337	0.026
-80.676	0.76	0.009		-80.713	0.834	0.017		-80.762	0.547	0.029		-80.634	0.394	0.028
-60.504	0.852	0.008		-60.504	0.888	0.014		-60.504	0.624	0.023		-60.48	0.468	0.029
-40.491	0.919	0.006		-40.454	0.935	0.011		-40.454	0.722	0.014		-40.369	0.609	0.025
-20.16	0.962	0.004		-20.374	0.973	0.007		-20.465	0.861	0.007		-20.264	0.836	0.013
-0.244	0.98	0.002		-0.195	0.979	0.005		-0.189	0.948	0.005		-0.116	0.953	0.003
19.946	0.979	0.003		19.946	0.953	0.004		19.952	0.96	0.001		20.05	0.973	0.001
40.21	0.963	0.007		40.07	0.916	0.007		40.228	0.944	0.009		40.234	0.964	0.003
60.236	0.926	0.015		60.254	0.872	0.011		60.107	0.911	0.016		60.4	0.936	0.006
Panel L
KCNQ1 WT + KCNE3 S57A (10 ng + 3 ng)		N = 5		KCNQ1 WT + KCNE3 S57A (10 ng + 0.3 ng)		N = 5		KCNQ1 WT + KCNE3 S57A (10 ng + 0.1 ng)		N = 5		KCNQ1 WT + KCNE3 S57A (10 ng + 0.03 ng)		N = 5
Voltage (mV)	G/Gmax			Voltage (mV)	G/Gmax			Voltage (mV)	G/Gmax			Voltage (mV)	G/Gmax
Mean	Mean	SEM		Mean	Mean	SEM		Mean	Mean	SEM		Mean	Mean	SEM
-100.824	0.623	0.024		-100.836	0.642	0.027		-100.946	0.469	0.013		-100.97	0.292	0.011
-80.646	0.656	0.023		-80.676	0.693	0.026		-80.585	0.535	0.015		-80.664	0.336	0.014
-60.541	0.698	0.022		-60.626	0.747	0.024		-60.522	0.607	0.016		-60.486	0.401	0.017
-40.405	0.745	0.02		-40.344	0.8	0.023		-40.411	0.705	0.012		-40.466	0.541	0.018
-20.148	0.789	0.019		-20.331	0.847	0.021		-20.3	0.853	0.003		-20.221	0.795	0.012
-0.067	0.832	0.017		-0.311	0.886	0.019		-0.226	0.94	0.006		-0.122	0.94	0.005
19.934	0.873	0.014		19.983	0.919	0.016		19.94	0.969	0.002		20.044	0.978	0.001
40.192	0.909	0.012		40.082	0.945	0.013		40.021	0.978	0.003		40.155	0.989	0.004
60.205	0.931	0.009		60.327	0.955	0.009		60.156	0.971	0.007		60.229	0.979	0.007
Panel R
KCNQ1 WT + KCNE3 S57A (10 ng + 3 ng)		N = 5		KCNQ1 WT + KCNE3 S57A (10 ng + 0.3 ng)		N = 5		KCNQ1 WT + KCNE3 S57A (10 ng + 0.1 ng)		N = 5		KCNQ1 WT + KCNE3 S57A (10 ng + 0.03 ng)		N = 5
Voltage (mV)	G/Gmax			Voltage (mV)	G/Gmax			Voltage (mV)	G/Gmax			Voltage (mV)	G/Gmax
Mean	Mean	SEM		Mean	Mean	SEM		Mean	Mean	SEM		Mean	Mean	SEM
-100.769	0.335	0.014		-100.848	0.339	0.016		-100.964	0.338	0.025		-100.769	0.142	0.014
-80.634	0.402	0.012		-80.75	0.409	0.012		-80.719	0.379	0.022		-80.615	0.178	0.015
-60.565	0.531	0.014		-60.529	0.522	0.009		-60.571	0.465	0.022		-60.535	0.253	0.019
-40.454	0.698	0.012		-40.308	0.675	0.009		-40.35	0.612	0.021		-40.399	0.435	0.021
-20.361	0.864	0.007		-20.258	0.854	0.009		-20.245	0.833	0.013		-20.343	0.775	0.015
-0.122	0.95	0.004		-0.146	0.955	0.008		-0.195	0.959	0.005		-0.146	0.955	0.005
19.989	0.969	0.005		20.001	0.964	0.002		19.977	0.971	0.003		20.007	0.977	0.002
40.07	0.961	0.014		40.112	0.936	0.006		40.1	0.942	0.004		40.149	0.961	0.003
60.205	0.936	0.018		60.321	0.89	0.01		60.223	0.897	0.006		60.26	0.925	0.003

## Sheet: Figure 3-figure supplement 2
Panel F
KCNQ1 WT + KCNE3 I61G		N = 10		KCNQ1 WT + KCNE3 I61A		N = 10		KCNQ1 WT + KCNE3 I61V		N = 10		KCNQ1 WT + KCNE3 I61F		N = 10		KCNQ1 WT + KCNE3 I61W		N = 10
Voltage (mV)	G/Gmax			Voltage (mV)	G/Gmax			Voltage (mV)	G/Gmax			Voltage (mV)	G/Gmax			Voltage (mV)	G/Gmax
Mean	Mean	SEM		Mean	Mean	SEM		Mean	Mean	SEM		Mean	Mean	SEM		Mean	Mean	SEM
-99.68	0.043	0.006		-99.805	0.029	0.005		-99.67	0.57	0.021		-99.725	0.043	0.003		-99.649	0.11	0.008
-79.727	0.049	0.007		-79.672	0.038	0.006		-79.797	0.601	0.019		-79.73	0.057	0.002		-79.758	0.143	0.009
-59.756	0.064	0.009		-59.824	0.053	0.007		-59.863	0.662	0.016		-59.848	0.106	0.003		-59.793	0.218	0.009
-39.862	0.098	0.01		-39.807	0.091	0.009		-39.743	0.735	0.014		-39.911	0.208	0.004		-39.807	0.375	0.007
-19.91	0.177	0.011		-19.971	0.177	0.01		-19.843	0.809	0.012		-19.943	0.367	0.007		-19.904	0.619	0.007
0.003	0.313	0.01		-0.043	0.32	0.013		-0.021	0.876	0.01		0.037	0.545	0.008		-0.067	0.825	0.008
19.958	0.487	0.01		19.958	0.5	0.014		19.968	0.928	0.008		19.897	0.704	0.008		19.91	0.937	0.006
39.932	0.665	0.01		39.938	0.681	0.013		39.935	0.962	0.006		39.944	0.832	0.007		39.969	0.973	0.002
59.94	0.82	0.01		59.839	0.831	0.011		59.848	0.973	0.003		59.885	0.922	0.005		59.854	0.944	0.002

## Sheet: Figure 3-figure supplement 3
Panel G
KCNQ1 WT + KCNE3 M65G		N = 10		KCNQ1 WT + KCNE3 M65A		N = 10		KCNQ1 WT + KCNE3 M65V		N = 10		KCNQ1 WT + KCNE3 M65L		N = 10		KCNQ1 WT + KCNE3 M65F		N = 10		KCNQ1 WT + KCNE3 M65W		N = 10
Voltage (mV)	G/Gmax			Voltage (mV)	G/Gmax			Voltage (mV)	G/Gmax			Voltage (mV)	G/Gmax			Voltage (mV)	G/Gmax			Voltage (mV)	G/Gmax
Mean	Mean	SEM		Mean	Mean	SEM		Mean	Mean	SEM		Mean	Mean	SEM		Mean	Mean	SEM		Mean	Mean	SEM
-99.734	0.222	0.012		-99.719	0.478	0.013		-100.183	0.164	0.018		-99.67	0.631	0.029		-99.738	0.356	0.016		-99.704	0.066	0.006
-79.736	0.286	0.011		-79.739	0.553	0.011		-80.151	0.199	0.015		-79.77	0.681	0.026		-79.724	0.425	0.015		-79.703	0.11	0.006
-59.766	0.429	0.01		-59.827	0.683	0.009		-60.095	0.284	0.014		-59.827	0.747	0.022		-59.787	0.528	0.015		-59.787	0.215	0.007
-39.862	0.633	0.009		-39.844	0.823	0.007		-40.106	0.428	0.015		-39.883	0.814	0.019		-39.85	0.64	0.015		-39.877	0.398	0.006
-19.849	0.831	0.009		-19.958	0.928	0.004		-20.102	0.607	0.019		-19.885	0.872	0.015		-19.928	0.749	0.015		-19.852	0.634	0.006
-0.012	0.944	0.006		0.046	0.97	0.001		-0.052	0.76	0.021		-0.052	0.918	0.012		-0.015	0.843	0.013		0.049	0.824	0.006
19.91	0.969	0.001		19.919	0.957	0.004		20.047	0.866	0.017		19.904	0.95	0.009		20.013	0.911	0.009		19.983	0.929	0.004
39.941	0.946	0.003		39.948	0.914	0.006		39.99	0.935	0.012		39.981	0.971	0.006		39.948	0.944	0.007		39.932	0.972	0.002
59.818	0.899	0.005		59.851	0.857	0.008		59.976	0.97	0.006		59.86	0.974	0.003		59.824	0.938	0.011		59.875	0.963	0.004

## Sheet: Figure 3-figure supplement 4
Panel F
KCNQ1 WT + KCNE3 A69G		N = 10		KCNQ1 WT + KCNE3 A69V		N = 10		KCNQ1 WT + KCNE3 A69L		N = 10		KCNQ1 WT + KCNE3 A69F		N = 10		KCNQ1 WT + KCNE3 A69W		N = 10
Voltage (mV)	G/Gmax			Voltage (mV)	G/Gmax			Voltage (mV)	G/Gmax			Voltage (mV)	G/Gmax			Voltage (mV)	G/Gmax
Mean	Mean	SEM		Mean	Mean	SEM		Mean	Mean	SEM		Mean	Mean	SEM		Mean	Mean	SEM
-99.713	0.574	0.027		-99.744	0.185	0.019		-99.701	0.165	0.009		-99.655	0.111	0.012		-99.768	0.037	0.005
-79.767	0.656	0.023		-79.749	0.217	0.018		-79.706	0.172	0.008		-79.712	0.149	0.016		-79.709	0.046	0.006
-59.842	0.757	0.02		-59.854	0.288	0.02		-59.897	0.236	0.009		-59.763	0.188	0.019		-59.827	0.075	0.008
-39.828	0.852	0.016		-39.865	0.4	0.017		-39.88	0.382	0.013		-39.832	0.255	0.02		-39.838	0.164	0.009
-19.897	0.926	0.01		-19.913	0.547	0.012		-19.968	0.597	0.018		-19.971	0.393	0.017		-19.916	0.392	0.012
-0.046	0.966	0.005		-0.015	0.68	0.019		0.055	0.793	0.016		0.052	0.589	0.011		-0.085	0.674	0.015
20.013	0.975	0.003		19.879	0.782	0.019		19.986	0.913	0.01		19.919	0.771	0.006		19.931	0.86	0.013
39.914	0.964	0.007		39.844	0.866	0.015		39.935	0.967	0.003		39.972	0.894	0.005		39.847	0.954	0.007
59.894	0.93	0.011		59.9	0.928	0.009		59.802	0.975	0.006		59.827	0.945	0.004		59.857	0.991	0.002

## Sheet: Figure 3-figure supplement 5
Panel F
KCNQ1 WT + KCNE3 I76G		N = 10		KCNQ1 WT + KCNE3 I76A		N = 10		KCNQ1 WT + KCNE3 I76V		N = 10		KCNQ1 WT + KCNE3 I76F		N = 10		KCNQ1 WT + KCNE3 I76W		N = 10
Voltage (mV)	G/Gmax			Voltage (mV)	G/Gmax			Voltage (mV)	G/Gmax			Voltage (mV)	G/Gmax			Voltage (mV)	G/Gmax
Mean	Mean	SEM		Mean	Mean	SEM		Mean	Mean	SEM		Mean	Mean	SEM		Mean	Mean	SEM
-99.68	0.063	0.005		-99.707	0.135	0.018		-99.741	0.431	0.011		-99.927	0.113	0.005		-100.07	0.164	0.006
-79.776	0.076	0.005		-79.794	0.175	0.026		-79.77	0.495	0.011		-79.895	0.19	0.009		-80.032	0.226	0.006
-59.863	0.107	0.006		-59.802	0.244	0.032		-59.833	0.592	0.011		-59.906	0.316	0.015		-60.086	0.322	0.009
-39.911	0.157	0.008		-39.859	0.419	0.034		-39.835	0.699	0.01		-39.926	0.471	0.021		-39.969	0.445	0.011
-19.977	0.231	0.01		-19.946	0.757	0.012		-19.98	0.799	0.008		-19.983	0.625	0.026		-20.059	0.589	0.014
0.034	0.329	0.013		0.067	0.947	0.007		-0.067	0.879	0.007		0.037	0.747	0.026		-0.027	0.732	0.016
19.983	0.446	0.014		19.928	0.964	0.008		19.971	0.936	0.005		20.059	0.835	0.023		20.016	0.842	0.015
39.938	0.575	0.013		39.905	0.939	0.009		39.938	0.968	0.003		39.908	0.903	0.017		40.076	0.915	0.012
59.854	0.698	0.012		59.863	0.897	0.011		59.808	0.975	0.002		59.918	0.944	0.011		60.007	0.94	0.008
