# Supplementary material for: Optimized tight binding between the S1 segment and KCNE3 is required for the constitutively open nature of the KCNQ1-KCNE3 channel complex
Source: eLife. 2022 Nov 4;11:e81683. doi: 10.7554/eLife.81683 (PMC9671499; doi:10.7554/eLife.81683)
Supplement: Figure 4—source data 1. — Maximum tail current amplitudes (Imax), parameters deduced from the Boltzmann fitting (V1/2 and z), and ratios of conductance at –100 mV (G–100mV) and maximum conductance (Gmax) of KCNQ1 mutants with KCNE3 mutants. n is the number of experiments. n.d., not determined. [file elife-81683-fig4-data1.xlsx]

## Sheet: Sheet1
Conditions	Imax (µA)	V1/2 (mV)	z	G-100mV/Gmax	n
KCNQ1 F127A + KCNE3 G73A	1.5 ± 0.1	-31.5 ± 0.6	1.7 ± 0.0	0.10 ± 0.01	10
KCNQ1 F127A + KCNE3 G73V	2.1 ± 0.2	-46.6 ± 0.8	1.4 ± 0.0	0.36 ± 0.02	10
KCNQ1 F127A + KCNE3 G73L	2.4 ± 0.3	n.d.	n.d.	0.67 ± 0.01	10
KCNQ1 F127A + KCNE3 G73F	2.1 ± 0.2	-55.6 ± 1.2	1.3 ± 0.0	0.45 ± 0.02	10
KCNQ1 F127A + KCNE3 G73W	1.8 ± 0.2	-46.2 ± 1.0	1.3 ± 0.0	0.38 ± 0.01	10
KCNQ1 F130A + KCNE3 A69G	0.8 ± 0.1	-9.3 ± 1.2	1.3 ± 0.0	0.10 ± 0.01	10
KCNQ1 F130A + KCNE3 A69V	0.7 ± 0.1	8.3 ± 2.5	1.0 ± 0.0	0.03 ± 0.01	10
KCNQ1 F130A + KCNE3 A69L	0.7 ± 0.1	1.8 ± 2.2	1.2 ± 0.0	0.03 ± 0.00	10
KCNQ1 F130A + KCNE3 A69F	1.5 ± 0.1	-18.8 ± 0.8	1.4 ± 0.0	0.05 ± 0.00	10
KCNQ1 F130A + KCNE3 A69W	0.8 ± 0.1	-9.3 ± 1.2	1.3 ± 0.0	0.10 ± 0.01	10
KCNQ1 F130V + KCNE3 A69G	1.2 ± 0.2	-35.2 ± 2.1	1.2 ± 0.0	0.11 ± 0.01	10
KCNQ1 F130V + KCNE3 A69V	0.7 ± 0.1	3.8 ± 2.2	1.1 ± 0.1	0.03 ± 0.01	10
KCNQ1 F130V + KCNE3 A69L	0.8 ± 0.1	-19.3 ± 1.8	1.2 ± 0.1	0.05 ± 0.01	10
KCNQ1 F130V + KCNE3 A69F	1.1 ± 0.1	-6.5 ± 1.3	1.3 ± 0.0	0.06 ± 0.01	10
KCNQ1 F130V + KCNE3 A69W	0.8 ± 0.1	-12.3 ± 0.6	1.3 ± 0.0	0.13 ± 0.01	10
KCNQ1 I138A + KCNE3 M65G	1.6 ± 0.2	-15.8 ± 1.2	1.1 ± 0.0	0.09 ± 0.01	10
KCNQ1 I138A + KCNE3 M65A	1.8 ± 0.2	-8.0 ± 1.0	1.2 ± 0.0	0.03 ± 0.01	10
KCNQ1 I138A + KCNE3 M65V	1.7 ± 0.1	-9.2 ± 1.5	0.9 ± 0.0	0.06 ± 0.01	10
KCNQ1 I138A + KCNE3 M65L	2.1 ± 0.3	n.d.	n.d.	0.52 ± 0.02	10
KCNQ1 I138A + KCNE3 M65F	1.6 ± 0.1	n.d.	n.d.	0.53 ± 0.01	10
KCNQ1 I138A + KCNE3 M65W	1.9 ± 0.2	-47.9 ± 1.6	1.0 ± 0.0	0.19 ± 0.01	10
KCNQ1 I138W + KCNE3 M65G	1.5 ± 0.2	3.7 ± 1.1	1.1 ± 0.0	0.11 ± 0.01	10
KCNQ1 I138W + KCNE3 M65A	2.2 ± 0.3	13.5 ± 1.1	1.1 ± 0.0	0.04 ± 0.01	10
KCNQ1 I138W + KCNE3 M65V	2.6 ± 0.2	-19.0 ± 0.9	1.2 ± 0.0	0.21 ± 0.03	10
KCNQ1 I138W + KCNE3 M65L	2.3 ± 0.3	-10.9 ± 2.0	0.6 ± 0.1	0.46 ± 0.02	10
KCNQ1 I138W + KCNE3 M65F	2.2 ± 0.3	-64.2 ± 2.7	0.7 ± 0.0	0.42 ± 0.03	10
KCNQ1 I138W + KCNE3 M65W	2.1 ± 0.3	-50.3 ± 1.9	0.7 ± 0.0	0.24 ± 0.01	10
KCNQ1 L142A + KCNE3 I61G	3.8 ± 0.3	26.0 ± 2.0	1.1 ± 0.0	0.04 ± 0.01	10
KCNQ1 L142A + KCNE3 I61A	2.8 ± 0.2	22.3 ± 1.4	1.0 ± 0.0	0.06 ± 0.01	10
KCNQ1 L142A + KCNE3 I61V	3.8 ± 0.4	28.0 ± 1.1	1.0 ± 0.0	0.07 ± 0.01	10
KCNQ1 L142A + KCNE3 I61F	2.0 ± 0.1	3.2 ± 1.4	1.1 ± 0.0	0.05 ± 0.01	10
KCNQ1 L142A + KCNE3 I61W	2.3 ± 0.2	6.7 ± 2.2	1.0 ± 0.0	0.12 ± 0.01	10
KCNQ1 L142W + KCNE3 I61G	2.8 ± 0.2	33.5 ± 3.3	1.2 ± 0.0	0.02 ± 0.00	10
KCNQ1 L142W + KCNE3 I61A	3.1 ± 0.2	24.0 ± 1.5	1.2 ± 0.0	0.01 ± 0.00	10
KCNQ1 L142W + KCNE3 I61V	2.2 ± 0.2	31.5 ± 2.3	1.1 ± 0.0	0.00 ± 0.00	10
KCNQ1 L142W + KCNE3 I61F	2.8 ± 0.2	10.3 ± 0.9	1.2 ± 0.0	0.02 ± 0.00	10
KCNQ1 L142W + KCNE3 I61W	2.7 ± 0.2	10.0 ± 1.3	1.2 ± 0.0	0.03 ± 0.00	10
KCNQ1 I145F + KCNE3 S57G	2.0 ± 0.1	4.6 ± 1.3	0.9 ± 0.0	0.43 ± 0.01	10
KCNQ1 I145F + KCNE3 S57A	1.4 ± 0.2	n.d.	n.d.	0.61 ± 0.02	10
KCNQ1 I145F + KCNE3 S57V	2.0 ± 0.2	5.9 ± 0.7	0.9 ± 0.0	0.13 ± 0.01	10
KCNQ1 I145F + KCNE3 S57L	2.5 ± 0.2	-7.8 ± 1.8	0.8 ± 0.0	0.16 ± 0.01	10
KCNQ1 I145F + KCNE3 S57F	1.9 ± 0.2	-3.3 ± 1.3	0.9 ± 0.0	0.11 ± 0.01	10
KCNQ1 I145F + KCNE3 S57W	1.8 ± 0.2	-14.2 ± 1.2	1.0 ± 0.0	0.09 ± 0.00	10
KCNQ1 I145W + KCNE3 S57G	2.4 ± 0.2	-7.8 ± 1.2	1.1 ± 0.0	0.08 ± 0.01	10
KCNQ1 I145W + KCNE3 S57A	1.7 ± 0.2	-11.8 ± 1.1	1.1 ± 0.1	0.09 ± 0.01	10
KCNQ1 I145W + KCNE3 S57V	1.7 ± 0.1	-12.7 ± 1.8	1.2 ± 0.0	0.12 ± 0.01	10
KCNQ1 I145W + KCNE3 S57L	1.7 ± 0.1	-6.3 ± 2.0	0.9 ± 0.0	0.18 ± 0.01	10
KCNQ1 I145W + KCNE3 S57F	2.0 ± 0.2	-7.8 ± 1.0	1.1 ± 0.0	0.07 ± 0.01	10
KCNQ1 I145W + KCNE3 S57W	2.2 ± 0.3	-14.2 ± 0.6	1.7 ± 0.0	0.13 ± 0.01	10
