# Supplementary material for: Optimized tight binding between the S1 segment and KCNE3 is required for the constitutively open nature of the KCNQ1-KCNE3 channel complex
Source: eLife. 2022 Nov 4;11:e81683. doi: 10.7554/eLife.81683 (PMC9671499; doi:10.7554/eLife.81683)
Supplement: Figure 4—source data 2. [file elife-81683-fig4-data2.xlsx]

## Sheet: Figure 4
Panel F
KCNQ1 F127A + KCNE3 WT		N = 10		KCNQ1 F127A + KCNE3 G73A		N = 10		KCNQ1 F127A + KCNE3 G73V		N = 10		KCNQ1 F127A + KCNE3 G73L		N = 10		KCNQ1 F127A + KCNE3 G73F		N = 10		KCNQ1 F127A + KCNE3 G73W		N = 10
Voltage (mV)	G/Gmax			Voltage (mV)	G/Gmax			Voltage (mV)	G/Gmax			Voltage (mV)	G/Gmax			Voltage (mV)	G/Gmax			Voltage (mV)	G/Gmax
Mean	Mean	SEM		Mean	Mean	SEM		Mean	Mean	SEM		Mean	Mean	SEM		Mean	Mean	SEM		Mean	Mean	SEM
-99.765	0.165	0.022		-99.692	0.102	0.009		-100.235	0.361	0.024		-99.796	0.672	0.013		-100.824	0.45	0.015		-100.037	0.375	0.013
-79.745	0.19	0.018		-79.739	0.123	0.008		-80.222	0.414	0.024		-79.752	0.74	0.011		-80.582	0.529	0.016		-79.984	0.44	0.015
-59.845	0.279	0.017		-59.818	0.211	0.008		-60.202	0.544	0.022		-59.79	0.825	0.009		-60.522	0.66	0.016		-60.08	0.559	0.015
-39.893	0.451	0.015		-39.914	0.423	0.009		-40.17	0.718	0.015		-39.929	0.903	0.006		-40.311	0.805	0.012		-39.981	0.712	0.012
-19.949	0.671	0.012		-19.974	0.709	0.01		-20.117	0.87	0.008		-19.879	0.958	0.003		-20.212	0.919	0.006		-20.078	0.861	0.006
-0.003	0.842	0.008		0.015	0.902	0.006		-0.058	0.954	0.004		-0.015	0.979	0.001		-0.089	0.965	0.003		0.018	0.948	0.003
19.937	0.939	0.004		19.971	0.974	0.002		20.016	0.981	0.001		19.925	0.973	0.001		20.065	0.958	0.004		19.983	0.975	0.002
39.969	0.982	0.002		39.954	0.972	0.005		39.981	0.976	0.002		39.926	0.954	0.003		40.152	0.924	0.007		40.024	0.969	0.004
59.833	0.983	0.002		59.869	0.923	0.008		60.083	0.947	0.004		59.86	0.923	0.004		60.373	0.869	0.009		60.013	0.936	0.007
Panel G
	KCNQ1 F127A	N =10
	+ KCNE3 WT	+ KCNE3 G73A	+ KCNE3 G73V	+ KCNE3 G73L	+ KCNE3 G73F	+ KCNE3 G73W
Mean	0.165	0.102	0.361	0.672	0.45	0.375
SEM	0.022	0.009	0.024	0.013	0.015	0.013
Panel N
KCNQ1 I145F + KCNE3 WT		N = 10		KCNQ1 I145F + KCNE3 S57G		N = 10		KCNQ1 I145F + KCNE3 S57A		N = 10		KCNQ1 I145F + KCNE3 S57V		N = 10		KCNQ1 I145F + KCNE3 S57L		N = 10		KCNQ1 I145F + KCNE3 S57F		N = 10		KCNQ1 I145F + KCNE3 S57W		N = 10
Voltage (mV)	G/Gmax			Voltage (mV)	G/Gmax			Voltage (mV)	G/Gmax			Voltage (mV)	G/Gmax			Voltage (mV)	G/Gmax			Voltage (mV)	G/Gmax			Voltage (mV)	G/Gmax
Mean	Mean	SEM		Mean	Mean	SEM		Mean	Mean	SEM		Mean	Mean	SEM		Mean	Mean	SEM		Mean	Mean	SEM		Mean	Mean	SEM
-99.728	0.114	0.009		-100.763	0.43	0.012		-100.748	0.613	0.021		-100.635	0.126	0.014		-100.803	0.159	0.013		-100.772	0.11	0.008		-100.809	0.09	0.004
-79.794	0.125	0.009		-80.682	0.43	0.01		-80.6	0.636	0.019		-80.606	0.145	0.013		-80.588	0.188	0.013		-80.573	0.125	0.008		-80.597	0.112	0.004
-59.875	0.177	0.009		-60.538	0.452	0.009		-60.471	0.685	0.016		-60.565	0.184	0.013		-60.477	0.246	0.013		-60.452	0.168	0.008		-60.538	0.172	0.006
-39.862	0.305	0.008		-40.39	0.506	0.008		-40.344	0.747	0.014		-40.289	0.254	0.013		-40.363	0.344	0.013		-40.314	0.263	0.007		-40.298	0.296	0.009
-19.989	0.491	0.006		-20.169	0.588	0.008		-20.255	0.813	0.011		-20.291	0.363	0.012		-20.251	0.476	0.014		-20.23	0.412	0.008		-20.215	0.48	0.012
-0.003	0.665	0.006		-0.131	0.683	0.008		-0.101	0.872	0.009		-0.043	0.507	0.011		-0.043	0.611	0.013		-0.089	0.572	0.01		-0.165	0.663	0.012
19.919	0.797	0.006		20.038	0.775	0.009		19.968	0.92	0.007		19.824	0.655	0.008		20.035	0.726	0.013		20.056	0.709	0.01		20.001	0.795	0.01
39.938	0.894	0.005		40.167	0.858	0.008		40.195	0.954	0.005		40.06	0.786	0.007		40.134	0.823	0.011		40.173	0.826	0.009		40.173	0.892	0.007
59.903	0.969	0.003		60.294	0.928	0.006		60.281	0.973	0.003		60.498	0.88	0.006		60.324	0.906	0.01		60.364	0.92	0.007		60.333	0.965	0.004
Panel M
	KCNQ1 I145F	N =10
	+ KCNE3 WT	+ KCNE3 S57G	+ KCNE3 S57A	+ KCNE3 S57V	+ KCNE3 S57L	+ KCNE3 S57F	+ KCNE3 S57W
Mean	0.114	0.43	0.613	0.126	0.159	0.11	0.09
SEM	0.009	0.012	0.021	0.014	0.013	0.008	0.004

## Sheet: Figure 4-figure supplement 1
Panel F
KCNQ1 F130A + KCNE3 A69G		N = 10		KCNQ1 F130A + KCNE3 A69V		N = 10		KCNQ1 F130A + KCNE3 A69L		N = 10		KCNQ1 F130A + KCNE3 A69F		N = 10		KCNQ1 F130A + KCNE3 A69W		N = 10
Voltage (mV)	G/Gmax			Voltage (mV)	G/Gmax			Voltage (mV)	G/Gmax			Voltage (mV)	G/Gmax			Voltage (mV)	G/Gmax
Mean	Mean	SEM		Mean	Mean	SEM		Mean	Mean	SEM		Mean	Mean	SEM		Mean	Mean	SEM
-100.812	0.045	0.003		-100.8	0.031	0.008		-100.793	0.034	0.004		-100.797	0.049	0.004		-100.806	0.095	0.005
-80.588	0.065	0.004		-80.664	0.046	0.008		-80.661	0.048	0.004		-80.566	0.072	0.005		-80.64	0.116	0.006
-60.492	0.105	0.005		-60.516	0.079	0.009		-60.535	0.078	0.005		-60.516	0.132	0.006		-60.541	0.162	0.006
-40.347	0.186	0.007		-40.414	0.143	0.01		-40.356	0.147	0.008		-40.353	0.267	0.01		-40.344	0.251	0.007
-20.264	0.35	0.01		-20.221	0.262	0.017		-20.248	0.294	0.018		-20.264	0.496	0.012		-20.215	0.424	0.012
-0.116	0.567	0.013		-0.061	0.433	0.025		-0.006	0.498	0.026		-0.079	0.749	0.011		-0.146	0.646	0.015
20.047	0.779	0.013		20.004	0.622	0.026		20.023	0.696	0.025		20.007	0.899	0.007		20.041	0.837	0.011
40.231	0.894	0.008		40.189	0.797	0.022		40.186	0.853	0.017		40.189	0.883	0.009		40.204	0.925	0.007
60.272	0.847	0.004		60.318	0.885	0.014		60.3	0.883	0.012		60.318	0.749	0.012		60.342	0.877	0.01
Panel G
	KCNQ1 F130A	N =10
	+ KCNE3 A69G	+ KCNE3 A69V	+ KCNE3 A69L	+ KCNE3 A69F	+ KCNE3 A69W
Mean	0.045	0.031	0.034	0.049	0.095
SEM	0.003	0.008	0.004	0.004	0.005
Panel M
KCNQ1 F130V + KCNE3 A69G		N = 10		KCNQ1 F130V + KCNE3 A69V		N = 10		KCNQ1 F130V + KCNE3 A69L		N = 10		KCNQ1 F130V + KCNE3 A69F		N = 10		KCNQ1 F130V + KCNE3 A69W		N = 10
Voltage (mV)	G/Gmax			Voltage (mV)	G/Gmax			Voltage (mV)	G/Gmax			Voltage (mV)	G/Gmax			Voltage (mV)	G/Gmax
Mean	Mean	SEM		Mean	Mean	SEM		Mean	Mean	SEM		Mean	Mean	SEM		Mean	Mean	SEM
-100.815	0.113	0.007		-100.803	0.026	0.007		-100.751	0.049	0.012		-100.739	0.062	0.007		-100.745	0.13	0.008
-80.606	0.185	0.011		-80.588	0.037	0.008		-80.6	0.083	0.014		-80.643	0.073	0.007		-80.621	0.147	0.008
-60.516	0.306	0.017		-60.562	0.069	0.009		-60.461	0.16	0.019		-60.611	0.106	0.007		-60.48	0.195	0.008
-40.384	0.471	0.023		-40.338	0.141	0.011		-40.402	0.297	0.022		-40.295	0.192	0.007		-40.356	0.295	0.007
-20.23	0.683	0.021		-20.23	0.28	0.015		-20.206	0.499	0.023		-20.193	0.368	0.011		-20.258	0.47	0.006
-0.003	0.87	0.011		-0.134	0.481	0.025		-0.052	0.719	0.022		-0.146	0.609	0.016		-0.168	0.693	0.006
20.041	0.925	0.004		20.062	0.668	0.029		19.965	0.868	0.016		20.096	0.806	0.014		19.995	0.86	0.006
40.125	0.887	0.009		40.204	0.811	0.025		40.155	0.929	0.008		40.161	0.92	0.009		40.213	0.943	0.004
60.324	0.802	0.015		60.321	0.911	0.015		60.269	0.921	0.016		60.263	0.968	0.002		60.352	0.959	0.007
Panel N
	KCNQ1 F130V	N =10
	+ KCNE3 A69G	+ KCNE3 A69V	+ KCNE3 A69L	+ KCNE3 A69F	+ KCNE3 A69W
Mean	0.113	0.026	0.049	0.062	0.13
SEM	0.007	0.007	0.012	0.007	0.008

## Sheet: Figure 4-figure supplement 2
Panel G
KCNQ1 I138A + KCNE3 M65G		N = 10		KCNQ1 I138A + KCNE3 M65A		N = 10		KCNQ1 I138A + KCNE3 M65V		N = 10		KCNQ1 I138A + KCNE3 M65L		N = 10		KCNQ1 I138A + KCNE3 M65F		N = 10		KCNQ1 I138A + KCNE3 M65W		N = 10
Voltage (mV)	G/Gmax			Voltage (mV)	G/Gmax			Voltage (mV)	G/Gmax			Voltage (mV)	G/Gmax			Voltage (mV)	G/Gmax			Voltage (mV)	G/Gmax
Mean	Mean	SEM		Mean	Mean	SEM		Mean	Mean	SEM		Mean	Mean	SEM		Mean	Mean	SEM		Mean	Mean	SEM
-100.76	0.087	0.01		-100.821	0.029	0.005		-100.797	0.061	0.005		-100.851	0.518	0.021		-100.806	0.526	0.007		-100.833	0.194	0.014
-80.612	0.099	0.009		-80.637	0.038	0.007		-80.64	0.081	0.006		-80.612	0.586	0.015		-80.597	0.602	0.007		-80.713	0.29	0.017
-60.477	0.16	0.009		-60.471	0.074	0.008		-60.495	0.137	0.008		-60.458	0.686	0.01		-60.51	0.699	0.008		-60.553	0.439	0.019
-40.335	0.296	0.008		-40.375	0.176	0.01		-40.393	0.258	0.009		-40.335	0.784	0.01		-40.35	0.791	0.008		-40.405	0.604	0.018
-20.221	0.494	0.011		-20.264	0.375	0.012		-20.325	0.433	0.013		-20.267	0.865	0.01		-20.203	0.868	0.007		-20.316	0.756	0.015
-0.119	0.685	0.013		-0.143	0.601	0.012		-0.082	0.601	0.017		-0.119	0.923	0.009		-0.177	0.926	0.006		-0.153	0.872	0.011
20.01	0.831	0.012		20.047	0.78	0.01		19.977	0.736	0.017		20.016	0.958	0.005		19.989	0.962	0.004		19.958	0.938	0.006
40.125	0.926	0.008		40.198	0.902	0.006		40.146	0.851	0.017		40.219	0.977	0.002		40.219	0.975	0.002		40.17	0.954	0.004
60.312	0.971	0.003		60.284	0.97	0.002		60.275	0.944	0.016		60.294	0.971	0.004		60.257	0.964	0.002		60.272	0.917	0.007
Panel H
	KCNQ1 I138A	N =10
	+ KCNE3 M65G	+ KCNE3 M65A	+ KCNE3 M65V	+ KCNE3 M65L	+ KCNE3 M65F	+ KCNE3 M65W
Mean	0.087	0.029	0.061	0.518	0.526	0.194
SEM	0.01	0.005	0.005	0.021	0.007	0.014
Panel O
KCNQ1 I138W + KCNE3 M65G		N = 10		KCNQ1 I138W + KCNE3 M65A		N = 10		KCNQ1 I138W + KCNE3 M65V		N = 10		KCNQ1 I138W + KCNE3 M65L		N = 10		KCNQ1 I138W + KCNE3 M65F		N = 10		KCNQ1 I138W + KCNE3 M65W		N = 10
Voltage (mV)	G/Gmax			Voltage (mV)	G/Gmax			Voltage (mV)	G/Gmax			Voltage (mV)	G/Gmax			Voltage (mV)	G/Gmax			Voltage (mV)	G/Gmax
Mean	Mean	SEM		Mean	Mean	SEM		Mean	Mean	SEM		Mean	Mean	SEM		Mean	Mean	SEM		Mean	Mean	SEM
-100.8	0.105	0.007		-100.79	0.043	0.005		-100.818	0.21	0.032		-100.742	0.456	0.02		-100.824	0.421	0.025		-100.897	0.237	0.011
-80.579	0.105	0.008		-80.64	0.04	0.004		-80.682	0.213	0.029		-80.606	0.484	0.019		-80.649	0.515	0.024		-80.667	0.338	0.013
-60.556	0.129	0.008		-60.519	0.052	0.005		-60.486	0.265	0.027		-60.513	0.533	0.016		-60.559	0.617	0.023		-60.587	0.465	0.016
-40.329	0.196	0.01		-40.384	0.094	0.005		-40.387	0.395	0.024		-40.454	0.594	0.013		-40.372	0.713	0.02		-40.332	0.594	0.017
-20.221	0.33	0.012		-20.251	0.202	0.006		-20.313	0.587	0.02		-20.236	0.661	0.011		-20.261	0.799	0.016		-20.288	0.715	0.016
-0.079	0.511	0.012		-0.064	0.381	0.009		-0.089	0.761	0.015		-0.116	0.728	0.01		-0.131	0.87	0.012		-0.101	0.818	0.013
19.943	0.69	0.011		20.078	0.584	0.011		20.013	0.881	0.01		20.01	0.794	0.009		19.977	0.92	0.008		20.02	0.893	0.01
40.176	0.836	0.008		40.161	0.766	0.01		40.176	0.954	0.005		40.189	0.853	0.009		40.134	0.946	0.005		40.216	0.931	0.006
60.306	0.931	0.004		60.294	0.9	0.006		60.251	0.988	0.001		60.306	0.897	0.008		60.269	0.937	0.005		60.309	0.92	0.007
Panel P
	KCNQ1 I138W	N =10
	+ KCNE3 M65G	+ KCNE3 M65A	+ KCNE3 M65V	+ KCNE3 M65L	+ KCNE3 M65F	+ KCNE3 M65W
Mean	0.105	0.043	0.21	0.456	0.421	0.237
SEM	0.007	0.005	0.032	0.02	0.025	0.011

## Sheet: Figure 4-figure supplement 3
Panel F
KCNQ1 L142A + KCNE3 I61G		N = 10		KCNQ1 L142A + KCNE3 I61A		N = 10		KCNQ1 L142A + KCNE3 I61V		N = 10		KCNQ1 L142A + KCNE3 I61F		N = 10		KCNQ1 L142A + KCNE3 I61W		N = 10
Voltage (mV)	G/Gmax			Voltage (mV)	G/Gmax			Voltage (mV)	G/Gmax			Voltage (mV)	G/Gmax			Voltage (mV)	G/Gmax
Mean	Mean	SEM		Mean	Mean	SEM		Mean	Mean	SEM		Mean	Mean	SEM		Mean	Mean	SEM
-99.78	0.04	0.007		-99.753	0.062	0.014		-100.726	0.071	0.005		-100.854	0.046	0.006		-100.574	0.121	0.013
-79.745	0.048	0.008		-79.807	0.072	0.016		-80.515	0.074	0.006		-80.627	0.049	0.006		-80.441	0.132	0.013
-59.86	0.06	0.009		-59.897	0.088	0.019		-60.434	0.088	0.007		-60.483	0.072	0.006		-60.385	0.157	0.014
-39.786	0.089	0.012		-39.825	0.121	0.02		-40.317	0.123	0.008		-40.414	0.143	0.006		-40.201	0.218	0.015
-19.971	0.155	0.015		-19.962	0.195	0.021		-20.245	0.195	0.01		-20.309	0.292	0.009		-20.078	0.341	0.019
0.031	0.281	0.02		0.034	0.326	0.02		-0.049	0.31	0.011		-0.125	0.488	0.014		-0.089	0.503	0.022
19.968	0.458	0.022		19.946	0.503	0.017		19.98	0.46	0.011		19.983	0.677	0.015		20.032	0.662	0.021
39.923	0.649	0.02		39.92	0.689	0.011		40.155	0.625	0.01		40.186	0.827	0.012		40.137	0.802	0.016
59.857	0.812	0.015		59.805	0.834	0.006		60.242	0.779	0.009		60.229	0.93	0.007		60.196	0.905	0.009
Panel G
	KCNQ1L142A	N =10
	+ KCNE3 I61G	+ KCNE3 I61A	+ KCNE3 I61V	+ KCNE3 I61F	+ KCNE3 I61W
Mean	0.04	0.062	0.071	0.046	0.121
SEM	0.007	0.014	0.005	0.006	0.013
Panel M
KCNQ1 L142W + KCNE3 I61G		N = 10		KCNQ1 L142W + KCNE3 I61A		N = 10		KCNQ1 L142W + KCNE3 I61V		N = 10		KCNQ1 L142W + KCNE3 I61F		N = 10		KCNQ1 L142W + KCNE3 I61W		N = 10
Voltage (mV)	G/Gmax			Voltage (mV)	G/Gmax			Voltage (mV)	G/Gmax			Voltage (mV)	G/Gmax			Voltage (mV)	G/Gmax
Mean	Mean	SEM		Mean	Mean	SEM		Mean	Mean	SEM		Mean	Mean	SEM		Mean	Mean	SEM
-99.731	0.022	0.002		-99.747	0.01	0.001		-99.707	0.003	0.001		-100.558	0.019	0.002		-100.583	0.03	0.003
-79.709	0.024	0.002		-79.825	0.012	0.001		-79.7	0.002	0.001		-80.435	0.022	0.002		-80.511	0.037	0.004
-59.79	0.03	0.003		-59.866	0.019	0.001		-59.76	0.007	0.002		-60.419	0.036	0.002		-60.397	0.054	0.006
-39.813	0.046	0.004		-39.92	0.04	0.003		-39.877	0.03	0.004		-40.314	0.079	0.004		-40.201	0.097	0.008
-19.955	0.094	0.01		-19.943	0.106	0.007		-19.94	0.09	0.01		-20.203	0.193	0.007		-20.126	0.211	0.01
-0.006	0.2	0.023		0	0.249	0.014		-0.049	0.205	0.018		-0.095	0.39	0.01		-0.089	0.403	0.014
19.894	0.369	0.034		19.968	0.457	0.018		20.004	0.375	0.024		19.995	0.616	0.011		20.05	0.624	0.015
39.761	0.574	0.035		39.896	0.676	0.016		39.841	0.582	0.024		40.149	0.805	0.009		40.109	0.81	0.012
59.613	0.77	0.027		59.872	0.852	0.01		59.83	0.771	0.017		60.19	0.922	0.004		60.223	0.92	0.007
Panel N
	KCNQ1L142W	N =10
	+ KCNE3 I61G	+ KCNE3 I61A	+ KCNE3 I61V	+ KCNE3 I61F	+ KCNE3 I61W
Mean	0.022	0.01	0.003	0.019	0.03
SEM	0.002	0.001	0.001	0.002	0.003

## Sheet: Figure 4-figure supplement 4
Panel G
KCNQ1 I145W + KCNE3 S57G		N = 10		KCNQ1 I145W + KCNE3 S57A		N = 10		KCNQ1 I145W + KCNE3 S57V		N = 10		KCNQ1 I145W + KCNE3 S57L		N = 10		KCNQ1 I145W + KCNE3 S57F		N = 10		KCNQ1 I145W + KCNE3 S57W		N = 10
Voltage (mV)	G/Gmax			Voltage (mV)	G/Gmax			Voltage (mV)	G/Gmax			Voltage (mV)	G/Gmax			Voltage (mV)	G/Gmax			Voltage (mV)	G/Gmax
Mean	Mean	SEM		Mean	Mean	SEM		Mean	Mean	SEM		Mean	Mean	SEM		Mean	Mean	SEM		Mean	Mean	SEM
-100.79	0.082	0.01		-100.815	0.085	0.008		-100.696	0.117	0.009		-100.824	0.182	0.009		-100.784	0.069	0.005		-100.8	0.13	0.008
-80.634	0.082	0.009		-80.624	0.098	0.008		-80.579	0.138	0.01		-80.627	0.204	0.009		-80.597	0.077	0.004		-80.579	0.141	0.008
-60.498	0.118	0.009		-60.562	0.152	0.008		-60.587	0.187	0.013		-60.471	0.253	0.009		-60.458	0.115	0.004		-60.44	0.176	0.008
-40.393	0.232	0.009		-40.356	0.27	0.009		-40.338	0.292	0.017		-40.35	0.344	0.01		-40.399	0.222	0.006		-40.347	0.268	0.008
-20.258	0.416	0.01		-20.248	0.448	0.01		-20.322	0.472	0.02		-20.193	0.478	0.014		-20.245	0.404	0.008		-20.264	0.474	0.008
-0.177	0.606	0.011		-0.15	0.651	0.016		-0.101	0.682	0.019		-0.119	0.63	0.02		-0.116	0.607	0.01		-0.192	0.757	0.01
19.949	0.763	0.01		20.001	0.811	0.017		19.977	0.836	0.016		19.989	0.755	0.02		20.078	0.771	0.009		20.013	0.919	0.009
40.137	0.882	0.008		40.167	0.912	0.013		40.088	0.926	0.011		40.179	0.853	0.016		40.195	0.89	0.006		40.216	0.96	0.008
60.248	0.961	0.004		60.269	0.96	0.005		60.327	0.973	0.005		60.321	0.928	0.012		60.269	0.962	0.003		60.291	0.96	0.017
Panel H
	KCNQ1 I145W	N =10
	+ KCNE3 S57G	+ KCNE3 S57A	+ KCNE3 S57V	+ KCNE3 S57L	+ KCNE3 S57F	+ KCNE3 S57W
Mean	0.082	0.085	0.117	0.182	0.069	0.13
SEM	0.01	0.008	0.009	0.009	0.005	0.008
