# Supplementary material for: Optimized tight binding between the S1 segment and KCNE3 is required for the constitutively open nature of the KCNQ1-KCNE3 channel complex
Source: eLife. 2022 Nov 4;11:e81683. doi: 10.7554/eLife.81683 (PMC9671499; doi:10.7554/eLife.81683)
Supplement: Figure 5—source data 1. — Maximum tail current amplitudes (Imax) and parameters deduced from the Boltzmann fitting (V1/2 and z) of KCNQ1vcf WT and mutants with or without KCNE3 mutants. n is the number of experiments. n.d., not determined. [file elife-81683-fig5-data1.xlsx]

## Sheet: Sheet1
Conditions	Imax (µA)	V1/2 (mV)	z	n
KCNQ1vcf WT	4.8 ± 0.6	-50.4 ± 1.4	1.8 ± 0.0	5
KCNQ1vcf WT + KCNE3 WT	16.9 ± 2.5	n.d.	n.d.	5
KCNQ1vcf F127A	2.3 ± 0.2	-56.2 ± 1.0	1.8 ± 0.0	5
KCNQ1vcf F127A + KCNE3 WT	4.9 ± 0.6	-96.8 ± 4.4	0.9 ± 0.0	5
KCNQ1vcf F127A + KCNE3 G73L	7.5 ± 1.6	n.d.	n.d.	5
KCNQ1vcf I145F	5.9 ± 0.8	-46.8 ± 1.9	1.5 ± 0.0	5
KCNQ1vcf I145F + KCNE3 WT	4.8 ± 0.6	-104.2 ± 8.5	0.5 ± 0.0	5
KCNQ1vcf I145F + KCNE3 S57A	9.0 ± 1.9	n.d.	n.d.	5
