# Supplementary material for: Optimized tight binding between the S1 segment and KCNE3 is required for the constitutively open nature of the KCNQ1-KCNE3 channel complex
Source: eLife. 2022 Nov 4;11:e81683. doi: 10.7554/eLife.81683 (PMC9671499; doi:10.7554/eLife.81683)
Supplement: Figure 5—source data 2. — Parameters deduced from the double Boltzmann fitting (V1/2[F1] and V1/2[F2]) of KCNQ1vcf WT and mutants with or without KCNE3 mutants. n is the number of experiments. >60 means over 60 mV. < –160 means under –160 mV. [file elife-81683-fig5-data2.xlsx]

## Sheet: Sheet1
Conditions	V1/2(F1) (mV)	V1/2(F2) (mV)	n
KCNQ1vcf WT	-44.3 ± 0.7	n.d.	5
KCNQ1vcf WT + KCNE3 WT	-141.7 ± 10.8	> 60	5
KCNQ1vcf F127A	-52.3 ± 2.7	n.d.	5
KCNQ1vcf F127A + KCNE3 WT	-77.1 ± 3.0	> 60	5
KCNQ1vcf F127A + KCNE3 G73L	< -160	-41.8 ± 5.9	5
KCNQ1vcf I145F	-36.6 ± 1.5	n.d.	5
KCNQ1vcf I145F + KCNE3 WT	-121.2 ± 11.6	> 60	5
KCNQ1vcf I145F + KCNE3 S57A	< -160	> 60	5
