# Supplementary material for: Optimized tight binding between the S1 segment and KCNE3 is required for the constitutively open nature of the KCNQ1-KCNE3 channel complex
Source: eLife. 2022 Nov 4;11:e81683. doi: 10.7554/eLife.81683 (PMC9671499; doi:10.7554/eLife.81683)
Supplement: Figure 5—source data 3. [file elife-81683-fig5-data3.xlsx]

## Sheet: Figure 5
Panel F
KCNQ1vcf WT + KCNE3 WT		N = 5		KCNQ1vcf F127A + KCNE3 WT		N = 5		KCNQ1vcf F127A + KCNE3 G73L		N = 5
Voltage (mV)	G/Gmax			Voltage (mV)	G/Gmax			Voltage (mV)	G/Gmax
Mean	Mean	SEM		Mean	Mean	SEM		Mean	Mean	SEM
-140.082	0.863	0.048		-140.027	0.108	0.023		-140.039	0.557	0.028
-119.958	0.948	0.025		-119.971	0.246	0.029		-120.129	0.677	0.023
-100.018	0.979	0.012		-100.043	0.422	0.03		-99.982	0.756	0.02
-79.901	0.974	0.006		-79.865	0.598	0.025		-79.883	0.817	0.018
-59.851	0.958	0.011		-59.888	0.75	0.019		-59.9	0.873	0.015
-39.85	0.931	0.018		-39.899	0.867	0.012		-39.832	0.909	0.016
-19.788	0.895	0.025		-19.812	0.937	0.007		-19.8	0.914	0.022
0.159	0.857	0.03		0.177	0.969	0.003		0.281	0.902	0.031
20.276	0.817	0.034		20.3	0.976	0.002		20.264	0.885	0.035
40.381	0.786	0.035		40.369	0.983	0.002		40.271	0.884	0.037
60.345	0.781	0.033		60.297	1.022	0.01		60.419	0.906	0.033
Panel G
KCNQ1vcf WT + KCNE3 WT		N = 5		KCNQ1vcf F127A + KCNE3 WT		N = 5		KCNQ1vcf F127A + KCNE3 G73L		N = 5
Voltage (mV)	ΔF/ΔF60 mV			Voltage (mV)	ΔF/ΔF60 mV			Voltage (mV)	ΔF/ΔF60 mV
Mean	Mean	SEM		Mean	Mean	SEM		Mean	Mean	SEM
-160.071	0	0.169053		-159.991	0	0.0505885		-160.089	0	0.0932878
-140.118	0.201405	0.093142		-140.039	0.0337068	0.0348546		-140.07	0.159591	0.0353574
-119.965	0.459832	0.0563571		-120.032	0.0935601	0.0244229		-120.05	0.305106	0.0385425
-100	0.633147	0.0324862		-100.061	0.221325	0.0094464		-99.9878	0.417293	0.0163987
-79.8767	0.697899	0.0487138		-79.9255	0.3762	0.0206113		-79.9133	0.487215	0.0340307
-59.8328	0.733306	0.0361749		-59.8877	0.495555	0.0414553		-59.8999	0.612336	0.0296304
-39.8865	0.747333	0.0586356		-39.7705	0.644562	0.0556027		-39.8804	0.744789	0.0736368
-19.7693	0.77962	0.0886455		-19.8914	0.721777	0.0603343		-19.7693	0.843984	0.0546434
0.158691	0.767179	0.083232		0.189209	0.799371	0.0763947		0.158691	0.942685	0.0542882
20.2759	0.876321	0.166433		20.2454	0.862617	0.0684621		20.2209	0.979796	0.0833547
40.3931	0.855726	0.132666		40.4236	0.93569	0.0795082		40.3503	0.980862	0.0672834
60.3577	1	0.163616		60.376	1	0.0921177		60.3638	1	0.0851609
Panel H
KCNQ1vcf I145F + KCNE3 WT		N = 5		KCNQ1vcf I145F + KCNE3 S57A		N = 5
Voltage (mV)	G/Gmax			Voltage (mV)	G/Gmax
Mean	Mean	SEM		Mean	Mean	SEM
-140.033	0.182	0.027		-140.021	0.724	0.058
-120.032	0.306	0.029		-119.989	0.829	0.044
-99.951	0.421	0.033		-99.945	0.886	0.033
-79.956	0.53	0.037		-79.883	0.919	0.028
-59.827	0.632	0.038		-59.814	0.938	0.024
-39.893	0.721	0.037		-39.88	0.952	0.02
-19.812	0.791	0.033		-19.867	0.964	0.016
0.195	0.847	0.029		0.305	0.976	0.01
20.215	0.889	0.023		20.27	0.988	0.006
40.271	0.924	0.019		40.442	1	0.005
60.358	0.933	0.022		60.364	1.005	0.006
Panel I
KCNQ1vcf I145F + KCNE3 WT		N = 5		KCNQ1vcf I145F + KCNE3 S57A		N = 5
Voltage (mV)	ΔF/ΔF60 mV			Voltage (mV)	ΔF/ΔF60 mV
Mean	Mean	SEM		Mean	Mean	SEM
-159.979	0	0.035371		-160.034	0	0.115121
-139.978	0.0771618	0.0367796		-140.057	0.217111	0.0777792
-119.971	0.246786	0.0177383		-120.032	0.419057	0.0319057
-100.006	0.388148	0.0056847		-99.9817	0.533733	0.0078057
-79.9255	0.4966	0.0191447		-79.9255	0.635628	0.0195942
-59.8816	0.593952	0.0329115		-59.7961	0.703436	0.0342323
-39.9231	0.685093	0.0449002		-39.8743	0.734018	0.0412349
-19.873	0.768682	0.0513325		-19.8853	0.790237	0.0597808
0.256348	0.819149	0.0526748		0.311279	0.83334	0.0608207
20.2881	0.855434	0.0631003		20.2576	0.888336	0.0887537
40.2954	0.910257	0.0654117		40.3564	0.940809	0.0895356
60.3149	1	0.0697746		60.3088	1	0.109326

## Sheet: Figure 5-figure supplement 1
Panel D
KCNQ1vcf WT		N = 5		KCNQ1vcf F127A		N = 5		KCNQ1vcf I145F		N = 5
Voltage (mV)	G/Gmax			Voltage (mV)	G/Gmax			Voltage (mV)	G/Gmax
Mean	Mean	SEM		Mean	Mean	SEM		Mean	Mean	SEM
-140.045	0.117	0.015		-139.954	0.102	0.012		-139.954	0.181	0.023
-120.032	0.137	0.014		-119.904	0.136	0.01		-119.94	0.205	0.022
-99.963	0.164	0.015		-100.006	0.176	0.007		-99.976	0.241	0.023
-79.944	0.23	0.018		-79.865	0.266	0.009		-79.865	0.307	0.025
-59.906	0.412	0.027		-59.9	0.488	0.014		-59.869	0.442	0.029
-39.813	0.723	0.022		-39.825	0.803	0.011		-39.795	0.668	0.029
-19.861	0.923	0.009		-19.836	0.95	0.005		-19.8	0.875	0.016
0.116	0.97	0.002		0.244	0.973	0.002		0.177	0.954	0.003
20.197	0.954	0.003		20.258	0.953	0.006		20.178	0.953	0.011
40.295	0.926	0.005		40.308	0.928	0.01		40.344	0.928	0.018
60.315	0.912	0.007		60.333	0.903	0.018		60.291	0.917	0.024
Panel E
KCNQ1vcf WT		N = 5		KCNQ1vcf F127A		N = 5		KCNQ1vcf I145F		N = 5
Voltage (mV)	ΔF/ΔF60 mV			Voltage (mV)	ΔF/ΔF60 mV			Voltage (mV)	ΔF/ΔF60 mV
Mean	Mean	SEM		Mean	Mean	SEM		Mean	Mean	SEM
-160.071	0.0356478	0.0142441		-160.059	0.0084449	0.0360059		-160.114	0.0160449	0.0123008
-140.021	0	0.0075494		-140.027	0	0.0136726		-139.923	0	0.0265203
-119.971	0.013186	0.0145224		-120.001	0.0224602	0.0307715		-119.965	0.0049513	0.0234448
-100.006	0.0119057	0.006201		-99.9756	0.0489031	0.01849		-99.9939	0.0037039	0.0150456
-79.9072	0.0481331	0.0153315		-79.8584	0.115093	0.0401874		-79.9011	0.10798	0.0185118
-59.8328	0.27024	0.0367584		-59.8633	0.413806	0.0629081		-59.8572	0.219887	0.0107585
-39.7949	0.585745	0.0653596		-39.8682	0.642887	0.101493		-39.917	0.439464	0.0343156
-19.8303	0.760425	0.0882737		-19.8059	0.806017	0.0900699		-19.8181	0.711416	0.061055
0.170898	0.87136	0.0974006		0.189209	0.878153	0.0948038		0.250244	0.84737	0.0676858
20.2454	0.944017	0.0993825		20.2637	0.912679	0.119184		20.3247	0.924762	0.0685058
40.3137	0.94983	0.111204		40.3137	0.93615	0.110124		40.2832	0.955868	0.0669809
60.3638	1	0.110744		60.3699	1	0.103916		60.3271	1	0.0889594
