# Supplementary material for: Optimized tight binding between the S1 segment and KCNE3 is required for the constitutively open nature of the KCNQ1-KCNE3 channel complex
Source: eLife. 2022 Nov 4;11:e81683. doi: 10.7554/eLife.81683 (PMC9671499; doi:10.7554/eLife.81683)
Supplement: Figure 6—source data 1. — Maximum tail current amplitudes (Imax), parameters deduced from the Boltzmann fitting (V1/2 and z), and ratios of conductance at –100 mV (G–100mV) and maximum conductance (Gmax) of KCNQ1 F127 mutants with KCNE1 WT. n is the number of experiments. n.d., not determined. [file elife-81683-fig6-data1.xlsx]

## Sheet: Sheet1
Conditions	Imax (µA)	V1/2 (mV)	z	n
KCNQ1 WT	2.5 ± 0.2	-33.1 ± 1.1	2.5 ± 0.1	5
KCNQ1 WT + KCNE1 WT	6.0 ± 0.7	17.3 ± 1.3	1.6 ± 0.0	5
KCNQ1 F127A	1.2 ± 0.1	-37.7 ± 0.2	3.0 ± 0.1	5
KCNQ1 F127A + KCNE1 WT	n.d.	> 60	n.d.	5
KCNQ1 F127V	2.1 ± 0.1	-29.2 ± 0.8	2.9 ± 0.1	5
KCNQ1 F127V + KCNE1 WT	10.3 ± 1.5	53.4 ± 0.8	1.6 ± 0.1	5
KCNQ1 F127L	1.5 ± 0.1	-34.4 ± 0.8	2.5 ± 0.1	5
KCNQ1 F127L + KCNE1 WT	7.1 ± 0.4	29.9 ± 1.1	1.5 ± 0.0	5
KCNQ1 F127W	3.9 ± 0.4	-27.4 ± 0.6	2.9 ± 0.1	5
KCNQ1 F127W + KCNE1 WT	6.5 ± 0.5	29.2 ± 1.0	1.7 ± 0.0	5
