# Supplementary material for: Optimized tight binding between the S1 segment and KCNE3 is required for the constitutively open nature of the KCNQ1-KCNE3 channel complex
Source: eLife. 2022 Nov 4;11:e81683. doi: 10.7554/eLife.81683 (PMC9671499; doi:10.7554/eLife.81683)
Supplement: Figure 6—source data 2. [file elife-81683-fig6-data2.xlsx]

## Sheet: Figure 6
Panel K
KCNQ1 WT		N = 5		KCNQ1 WT + KCNE1 WT		N = 5		KCNQ1 F127A		N = 5		KCNQ1 F127A + KCNE1 WT		N = 5
Voltage (mV)	G/Gmax			Voltage (mV)	G/Gmax			Voltage (mV)	G/Gmax			Voltage (mV)	I/I60mV
Mean	Mean	SEM		Mean	Mean	SEM		Mean	Mean	SEM		Mean	Mean	SEM
-100.739	0.059	0.007		-100.903	0.002	0.001		-100.903	0.077	0.007		-100.763	0.0477038	0.00953411
-80.621	0.08	0.011		-80.621	0.004	0.001		-80.67	0.091	0.007		-80.627	0.0579347	0.0107202
-60.535	0.142	0.014		-60.498	0.006	0.001		-60.645	0.159	0.009		-60.645	0.0652787	0.0114614
-40.387	0.367	0.023		-40.338	0.017	0.002		-40.491	0.461	0.01		-40.411	0.0714697	0.0124837
-20.27	0.801	0.023		-20.38	0.077	0.009		-20.355	0.906	0.003		-20.313	0.0803806	0.0152409
-0.146	0.965	0.006		-0.043	0.257	0.015		-0.159	0.985	0.002		-0.122	0.126668	0.0162233
20.093	0.954	0.009		19.971	0.546	0.021		19.958	0.976	0.008		20.02	0.195526	0.021697
40.088	0.911	0.013		40.161	0.794	0.015		40.161	0.933	0.012		40.143	0.359796	0.0270256
60.352	0.827	0.018		60.284	0.941	0.007		60.358	0.815	0.016		60.278	1	0
Panel L
KCNQ1 F127V		N = 5		KCNQ1 F127V + KCNE1 WT		N = 5
Voltage (mV)	G/Gmax			Voltage (mV)	G/Gmax
Mean	Mean	SEM		Mean	Mean	SEM
-100.726	0.049	0.005		-100.781	0.003	0
-80.597	0.058	0.002		-80.731	0.004	0
-60.406	0.094	0.002		-60.504	0.004	0
-40.338	0.26	0.011		-40.308	0.006	0.001
-20.239	0.751	0.021		-20.239	0.012	0.002
-0.195	0.964	0.006		-0.122	0.034	0.006
19.983	0.937	0.008		19.934	0.108	0.012
40.216	0.888	0.015		40.222	0.301	0.015
60.345	0.823	0.019		60.303	0.61	0.01
Panel M
KCNQ1 F127L		N = 5		KCNQ1 F127L + KCNE1 WT		N = 5
Voltage (mV)	G/Gmax			Voltage (mV)	G/Gmax
Mean	Mean	SEM		Mean	Mean	SEM
-100.818	0.11	0.018		-100.854	0.002	0.001
-80.627	0.15	0.023		-80.609	0.003	0.001
-60.504	0.213	0.024		-60.565	0.005	0.001
-40.405	0.429	0.019		-40.387	0.01	0.001
-20.447	0.833	0.014		-20.27	0.038	0.004
-0.684	0.969	0.007		-0.128	0.144	0.01
19.385	0.956	0.012		19.983	0.367	0.015
39.624	0.936	0.018		40.179	0.638	0.015
59.662	0.885	0.019		60.254	0.859	0.008
Panel N
KCNQ1 F127W		N = 5		KCNQ1 F127W + KCNE1 WT		N = 5
Voltage (mV)	G/Gmax			Voltage (mV)	G/Gmax
Mean	Mean	SEM		Mean	Mean	SEM
-100.83	0.022	0.001		-100.793	0	0.001
-80.695	0.029	0		-80.579	0.001	0.001
-60.382	0.055	0.001		-60.553	0.001	0.002
-40.399	0.208	0.006		-40.32	0.005	0.002
-20.306	0.7	0.018		-20.251	0.024	0.002
-0.134	0.956	0.006		-0.189	0.116	0.005
20.099	0.872	0.005		19.995	0.358	0.015
40.234	0.754	0.008		40.204	0.667	0.016
60.248	0.642	0.009		60.284	0.89	0.01
Panel O
	KCNQ1 F127A	N =5		KCNQ1 F127V	N =5		KCNQ1 F127L	N =5		KCNQ1 WT	N =5		KCNQ1 F127W	N =5
	-	+ KCNE1 WT		-	+ KCNE1 WT		-	+ KCNE1 WT		-	+ KCNE1 WT		-	+ KCNE1 WT
V1/2	-37.729	n.d.		-29.1695	53.3563		-34.4323	29.8594		-33.0788	17.2704		-27.4277	29.2463
SEM	0.237166	n.d.		0.783671	0.796366		0.849319	1.1265		1.08326	1.33795		0.613546	1.00616
